# Supplementary material for: Asymmetric Michael addition reactions of pyrrolones with chalcones catalyzed by vicinal primary-diamine salts
Source: Royal Society of Chemistry journal article supplement (doi:10.1039/c7ra03069j), 2017-01-01
Supplement: c7ra03069j1.pdf [file c7ra03069j1.pdf]

## Supporting Information

### **Asymmetric Michael addition reactions of pyrrolones with chalcones catalyzed by vicinal primary-diamine salts**

Xiaolei Du, Dawei Yin, Zemei Ge, Xin Wang\* and Runtao Li\*

*State Key Laboratory of Nature and Biomimetic Drugs, School of Pharmaceutical  
Science, Peking University, Beijing 100191, China*

### **Contents**

|                                                                       |    |
|-----------------------------------------------------------------------|----|
| A. General information .....                                          | 2  |
| B. Experimental procedures and characterization data of products..... | 2  |
| a General procedure for the synthesis of products.....                | 2  |
| b Characterization data .....                                         | 3  |
| c NMR Spectra.....                                                    | 14 |
| d HPLC Spectra .....                                                  | 32 |

## A. General information

$^1\text{H}$  NMR spectra were recorded on a Bruker AVANCE III-400 spectrometer. Chemical shifts (in ppm) were referenced to the solvent residual signal ( $\delta = 7.26$  ppm) of  $\text{CDCl}_3$ .  $^{13}\text{C}$  NMR spectra were obtained by using the same NMR spectrometer and were calibrated to  $\text{CDCl}_3$  ( $\delta = 77.00$  ppm). High Resolution Mass spectra were recorded using a Fourier Transform Ion Cyclotron Resonance Mass Spectrometer (APEX IV, Bruker). Unless otherwise noted, materials obtained from commercial suppliers were used without further purification. Column chromatography was carried out on silica gel (particle size 200–300 mesh ASTM).

## B. Experimental procedures and characterization data of products

### a. General procedure for the synthesis of products

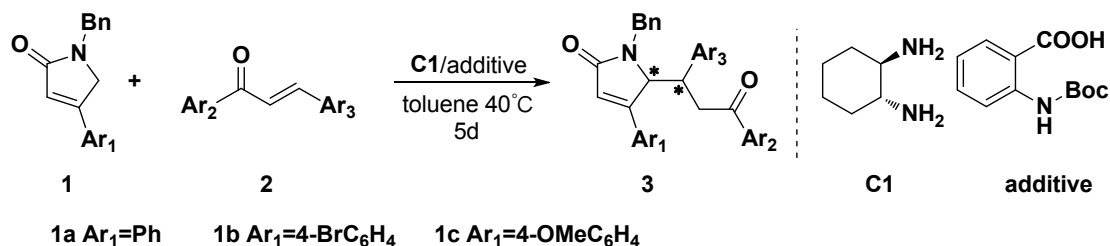

Pyrrolone **1** (0.15 mmol), chalcone **2** (0.225 mmol) was dissolved in toluene (1.5 mL), and the catalyst **C1** (0.03 mmol), acid additive (0.06 mmol) was added. The mixture was reacted at 40 °C for 5 days. After the completion of the reaction as indicated by TLC, the mixture was cooled to room temperature and the solvent was evaporated. 10 mL of  $\text{CH}_2\text{Cl}_2$  was added and the mixture was washed with 5% HCl, 2% NaOH, saturated NaCl, the organic phase was dried with anhydrous  $\text{Na}_2\text{SO}_4$ . The mixture was filtered, the solvent was evaporated in vacuo to afford the crude product. Chromatography on silica gel (ethyl acetate-dichloromethane-petroleum ether=1:1:4) gave the corresponding product **3** as a colourless oil.

## b. Characterization data

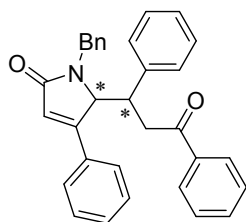

### ***N*-Benzyl-5-(3-oxo-1,3-diphenylpropyl)-4-phenyl-1H-pyrrol-2(5H)-one (3a)**

Yield 65%, colourless oil;  $^1\text{H}$  NMR (400 MHz,  $\text{CDCl}_3$ ): (syn)  $\delta$  7.89 (d,  $J = 7.7$  Hz, 2H), 7.62 (t,  $J = 7.4$  Hz, 1H), 7.50 (t,  $J = 7.6$  Hz, 2H), 7.30 (m, 4H), 7.28 – 7.20 (m, 4H), 7.18 – 7.11 (m, 2H), 7.09 (d,  $J = 7.1$  Hz, 1H), 7.03 (t,  $J = 7.4$  Hz, 2H), 6.65 (d,  $J = 7.5$  Hz, 2H), 6.22 (s, 1H), 5.49 (dd,  $J = 15.3$  Hz, 1H), 4.91 (d,  $J = 1.6$  Hz, 1H), 4.34 (d,  $J = 15.4$  Hz, 1H), 4.16 (td,  $J = 7.3, 2.3$  Hz, 1H), 3.46 – 3.29 (m, 2H).  $^{13}\text{C}$  NMR (100 MHz,  $\text{CDCl}_3$ ): (syn)  $\delta$  197.57, 171.86, 160.48, 137.67, 137.00, 136.70, 133.43, 132.48, 129.52, 128.95, 128.71, 128.58, 128.14, 128.08, 128.01, 127.94, 127.79, 127.37, 126.92, 122.43, 64.53, 45.67, 40.94, 37.41; ES-HRMS: Calcd for  $\text{C}_{32}\text{H}_{28}\text{NO}_2$   $[\text{M}+\text{H}]^+$ , 458.2114, Found 458.2105.

The enantiomeric excess was determined by HPLC analysis. (OD-H, hexane:IPA= 85:15, flow rate:1.0 mL/min) :  $t_{\text{R}}$  9.90min (minor) ,  $t_{\text{R}}$  20.71min (major) , ee 95%

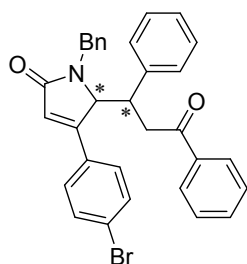

### ***N*-Benzyl-5-(3-oxo-1,3-diphenylpropyl)-4-(4-bromophenyl)-1H-pyrrol-2(5H)-one (3b)**

Yield 40%, colourless oil;  $^1\text{H}$  NMR (400 MHz,  $\text{CDCl}_3$ ): (syn)  $\delta$  7.89 (d,  $J = 7.6$  Hz, 2H), 6.80-7.80(m, 15H), 6.66 (d,  $J = 7.4$  Hz, 2H), 6.22 (s, 1H), 5.48 (d,  $J = 15.3$  Hz, 1H), 4.87 (m, 1H), 4.32 (d,  $J = 15.4$  Hz, 1H), 4.18 – 4.06 (m, 1H), 3.37 (d,  $J = 7.1$  Hz,

2H).  $^{13}\text{C}$  NMR (100 MHz,  $\text{CDCl}_3$ ): (syn)  $\delta$  197.48, 171.52, 159.14, 139.11, 137.51, 137.04, 136.84, 136.64, 133.52, 132.42, 131.79, 128.98, 128.84, 128.75, 128.21, 128.15, 127.98, 127.93, 123.93, 122.89, 64.38, 45.72, 40.91, 37.30; ES-HRMS: Calcd for  $\text{C}_{32}\text{H}_{27}\text{BrNO}_2$   $[\text{M}+\text{H}]^+$ , 536.1219, Found 536.1199.

The enantiomeric excess was determined by HPLC analysis. (OD-H, hexane:IPA= 85:15, flow rate:1.0 mL/min) :  $t_{\text{R}}$  11.41min (minor) ,  $t_{\text{R}}$  26.52min (major) , ee 90%

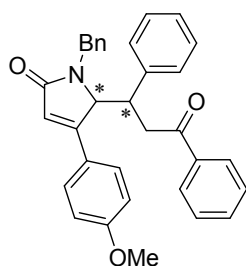

***N*-Benzyl-5-(3-oxo-1,3-diphenylpropyl)-4-methoxyphenyl-1H-pyrrol-2(5H)-one  
(3c)**

Yield 55%, colourless oil;  $^1\text{H}$  NMR (400 MHz,  $\text{CDCl}_3$ ): (syn)  $\delta$  7.95 – 7.86 (m, 2H), 7.62 (t,  $J$  = 7.4 Hz, 1H), 7.50 (t,  $J$  = 7.7 Hz, 2H), 7.30 (m, 3H), 7.24 (m, 2H), 7.19 – 7.10 (m, 3H), 7.07 (t,  $J$  = 7.2 Hz, 2H), 6.79 (d,  $J$  = 8.8 Hz, 2H), 6.69 (d,  $J$  = 7.1 Hz, 2H), 6.12 (s, 1H), 5.49 (d,  $J$  = 15.4 Hz, 1H), 4.87 (d,  $J$  = 2.1 Hz, 1H), 4.34 (d,  $J$  = 15.4 Hz, 1H), 4.14 (td,  $J$  = 7.2, 2.6 Hz, 1H), 3.83 (s, 3H), 3.41 (d,  $J$  = 7.3 Hz, 2H).  $^{13}\text{C}$  NMR (100 MHz,  $\text{CDCl}_3$ ): (syn)  $\delta$  197.70, 172.31, 160.73, 160.10, 137.75, 137.09, 136.71, 133.44, 128.93, 128.90, 128.71, 128.11, 128.07, 127.95, 127.72, 126.94, 125.00, 120.41, 114.03, 64.29, 55.36, 45.84, 41.27, 37.86; ES-HRMS: Calcd for  $\text{C}_{33}\text{H}_{30}\text{NO}_3$   $[\text{M}+\text{H}]^+$ , 488.2220, Found 488.2202.

The enantiomeric excess was determined by HPLC analysis. (OD-H, hexane:IPA= 85:15, flow rate:1.0 mL/min) :  $t_{\text{R}}$  12.07min (minor) ,  $t_{\text{R}}$  27.83min (major) , ee 90%

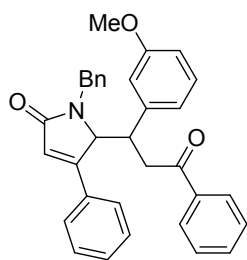

***N*-Benzyl-5-(1-(3-methoxyphenyl)-3-oxo-3-phenylpropyl)-4-phenyl-1H-pyrrol-2(5*H*)-one (3d)**

Yield 70%, colourless oil;  $^1\text{H}$  NMR (400 MHz,  $\text{CDCl}_3$ ): (syn)  $\delta$  7.79 (d,  $J = 7.8$  Hz, 2H), 6.80-7.65 (m, 15H), 6.65 (m, 2H), 6.35 (s, 1H), 5.27 (d,  $J = 14.9$  Hz, 1H), 4.90 (m, 1H), 4.09 (m, 1H), 3.91 (d,  $J = 14.9$  Hz, 1H), 3.76 (s, 3H), 3.32 (ddd,  $J = 24.2, 17.9, 7.1$  Hz, 2H).  $^{13}\text{C}$  NMR (100 MHz,  $\text{CDCl}_3$ ): (syn)  $\delta$  197.37, 171.66, 159.71, 159.36, 140.98, 137.22, 136.51, 133.31, 132.45, 130.20, 129.56, 129.18, 128.96, 128.62, 128.49, 128.18, 127.97, 127.33, 123.37, 120.26, 114.34, 112.20, 65.11, 55.19, 45.00, 40.65, 35.55; ES-HRMS: Calcd for  $\text{C}_{33}\text{H}_{30}\text{NO}_3$   $[\text{M}+\text{H}]^+$ , 488.2220, Found 488.2220.

The enantiomeric excess was determined by HPLC analysis. (OD-H, hexane:IPA= 85:15, flow rate:1.0 mL/min) :  $t_{\text{R}}$  12.39min (minor) ,  $t_{\text{R}}$  30.86min (major) , ee 90%

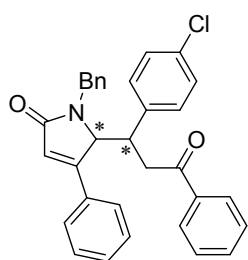

***N*-Benzyl-5-(1-(4-chlorophenyl)-3-oxo-3-phenylpropyl)-4-phenyl-1H-pyrrol-2(5*H*)-one (3e)**

Yield 62%, colourless oil;  $^1\text{H}$  NMR (400 MHz,  $\text{CDCl}_3$ ): (syn)  $\delta$  7.92 – 7.84 (m, 2H), 7.63 (t,  $J = 7.4$  Hz, 1H), 7.50 (t,  $J = 7.7$  Hz, 2H), 7.35 – 7.30 (m, 4H), 7.29 – 7.24 (m, 4H), 7.20 – 7.15 (m, 2H), 7.00 (t,  $J = 5.5$  Hz, 2H), 6.56 (d,  $J = 8.4$  Hz, 2H), 6.23 (s, 1H), 5.46 (d,  $J = 15.4$  Hz, 1H), 4.87 (d,  $J = 2.1$  Hz, 1H), 4.34 (d,  $J = 15.4$  Hz, 1H),

4.10 (td,  $J = 7.2, 2.7$  Hz, 1H), 3.36 (d,  $J = 7.2$  Hz, 2H).  $^{13}\text{C}$  NMR (100 MHz,  $\text{CDCl}_3$ ): (syn)  $\delta$  197.23, 171.93, 160.25, 136.90, 136.55, 136.22, 133.56, 132.80, 132.36, 129.74, 129.32, 128.98, 128.76, 128.71, 128.18, 128.11, 127.93, 127.87, 127.36, 122.51, 64.41, 45.96, 40.62, 37.65; ES-HRMS: Calcd for  $\text{C}_{32}\text{H}_{27}\text{ClNO}_2$   $[\text{M}+\text{H}]^+$ , 492.1724, Found 492.1727.

The enantiomeric excess was determined by HPLC analysis. (OD-H, hexane:IPA= 85:15, flow rate:1.0 mL/min) :  $t_{\text{R}}$  10.19min (minor) ,  $t_{\text{R}}$  20.38min (major) , ee 81%

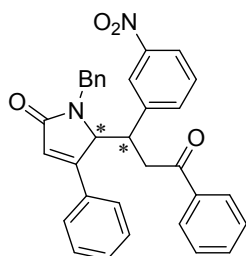

***N*-Benzyl-5-(1-(3-nitrophenyl)-3-oxo-3-phenylpropyl)-4-phenyl-1H-pyrrol-2(5H)-one (3f)**

Yield 75%, colourless oil;  $^1\text{H}$  NMR (400 MHz,  $\text{CDCl}_3$ ): (syn)  $\delta$  7.89 (d,  $J = 7.4$  Hz, 2H), 7.22-7.55 (m, 15H), 7.14 (m, 2H), 6.23 (s, 1H), 5.37 (d,  $J = 15.3$  Hz, 1H), 4.87 (m, 1H), 4.40 (d,  $J = 15.4$  Hz, 1H), 4.24 (m, 1H), 3.41 (d,  $J = 7.1$  Hz, 2H).  $^{13}\text{C}$  NMR (100 MHz,  $\text{CDCl}_3$ ): (syn)  $\delta$  196.82, 171.79, 160.02, 147.77, 140.00, 136.76, 136.27, 134.76, 134.25, 133.80, 129.98, 129.32, 129.14, 128.95, 128.88, 128.84, 128.77, 128.17, 128.06, 127.98, 127.49, 127.27, 123.02, 122.82, 122.05, 64.70, 46.13, 40.78, 36.96; ES-HRMS: Calcd for  $\text{C}_{32}\text{H}_{27}\text{N}_2\text{O}_4$   $[\text{M}+\text{H}]^+$ , 503.1965, Found 503.1971.

The enantiomeric excess was determined by HPLC analysis. (OD-H, hexane:IPA= 75:25, flow rate:0.3 mL/min) :  $t_{\text{R}}$  48.27min (minor) ,  $t_{\text{R}}$  81.21min (major) , ee 92%

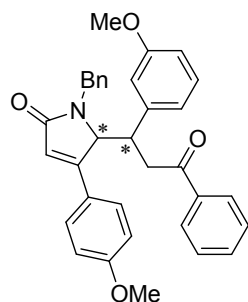

***N*-Benzyl-5-(1-(3-methoxyphenyl)-3-oxo-3-phenylpropyl)-4-(4-methoxyphenyl)-1H-pyrrol-2(5H)-one (3g)**

Yield 64%, colourless oil;  $^1\text{H}$  NMR (400 MHz,  $\text{CDCl}_3$ ): (syn)  $\delta$  7.92 – 7.86 (m, 2H), 7.50 (t,  $J = 7.7$  Hz, 2H), 7.41 (dd,  $J = 17.8, 8.3$  Hz, 3H), 7.28 – 7.20 (m, 5H), 7.02 – 6.91 (m, 2H), 6.87 – 6.80 (m, 2H), 6.29 (s, 1H), 6.16 (s, 2H), 5.48 (d,  $J = 15.4$  Hz, 1H), 4.84 (d,  $J = 2.1$  Hz, 1H), 4.30 (d,  $J = 15.4$  Hz, 1H), 4.14 (td,  $J = 7.4, 2.7$  Hz, 1H), 3.82 (s, 3H), 3.58 (s, 3H), 3.34 (qd,  $J = 18.0, 7.2$  Hz, 2H).  $^{13}\text{C}$  NMR (100 MHz,  $\text{CDCl}_3$ ): (syn)  $\delta$  197.65, 172.10, 160.73, 160.05, 159.24, 139.44, 137.09, 136.73, 133.41, 129.05, 128.91, 128.70, 128.43, 128.17, 127.94, 127.73, 125.10, 120.58, 120.46, 114.62, 113.94, 112.54, 64.53, 55.34, 54.92, 45.54, 41.00, 37.24; ES-HRMS: Calcd for  $\text{C}_{34}\text{H}_{32}\text{NO}_4$   $[\text{M}+\text{H}]^+$ , 518.2325, Found 518.2326.

The enantiomeric excess was determined by HPLC analysis. (OD-H, hexane:IPA= 85:15, flow rate:1.0 mL/min) :  $t_{\text{R}}$  14.63min (minor) ,  $t_{\text{R}}$  40.45min (major) , ee 93%

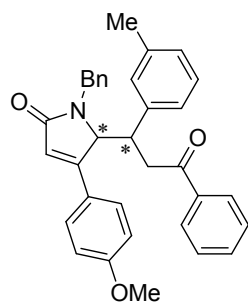

***N*-Benzyl-5-(1-(3-methylphenyl)-3-oxo-3-phenylpropyl)-4-(4-methoxyphenyl)-1H-pyrrol-2(5H)-one (3h)**

Yield 55%; colourless oil;  $^1\text{H}$  NMR (400 MHz,  $\text{CDCl}_3$ ): (syn)  $\delta$  7.89 (d,  $J = 7.3$  Hz, 2H), 7.50 (t,  $J = 7.7$  Hz, 2H), 7.30 (m, 5H), 6.95(m, 4H), 6.78 (t,  $J = 6.8$  Hz, 2H), 6.38

(s, 1H), 6.14 (s, 1H), 5.43 (d,  $J = 15.4$  Hz, 1H), 4.83 (m, 1H), 4.34 (d,  $J = 15.4$  Hz, 1H), 4.12 (td,  $J = 7.1, 2.7$  Hz, 1H), 3.82 (s, 3H), 3.35 (m, 2H), 2.11 (s, 3H).  $^{13}\text{C}$  NMR (100 MHz,  $\text{CDCl}_3$ ): (syn)  $\delta$  197.74, 172.15, 160.70, 160.19, 139.56, 137.73, 137.46, 137.22, 136.79, 133.37, 128.96, 128.89, 128.68, 128.38, 128.21, 127.96, 127.70, 127.31, 125.26, 124.78, 120.60, 113.88, 64.80, 55.33, 45.67, 40.96, 37.33, 21.28; ES-HRMS: Calcd for  $\text{C}_{34}\text{H}_{32}\text{NO}_3$   $[\text{M}+\text{H}]^+$ , 502.2376, Found 502.2373.

The enantiomeric excess was determined by HPLC analysis. (OD-H, hexane:IPA= 85:15, flow rate:1.0 mL/min) :  $t_{\text{R}}$  10.72min (minor) ,  $t_{\text{R}}$  22.10min (major) , ee 85%

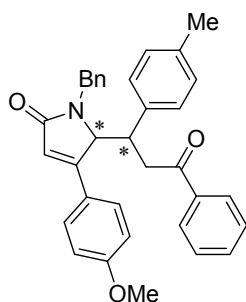

***N*-Benzyl-5-(1-(*p*-tolyl)-3-oxo-3-phenylpropyl)-4-(4-methoxyphenyl)-1H-pyrrol-2(5*H*)-one (3i)**

Yield 60%, colourless oil;  $^1\text{H}$  NMR (400 MHz,  $\text{CDCl}_3$ ): (syn)  $\delta$  7.89 (d,  $J = 8.0$  Hz, 2H), 7.62 (t,  $J = 7.3$  Hz, 1H), 7.50 (t,  $J = 7.6$  Hz, 2H), 7.28 (m, 3H), 7.20 (m, 4H), 6.88 (d,  $J = 7.8$  Hz, 2H), 6.81 (d,  $J = 8.6$  Hz, 2H), 6.58 (d,  $J = 7.8$  Hz, 2H), 6.11 (s, 1H), 5.48 (d,  $J = 15.4$  Hz, 1H), 4.86 (d,  $J = 1.0$  Hz, 1H), 4.33 (d,  $J = 15.4$  Hz, 1H), 4.07 (t,  $J = 6.2$  Hz, 1H), 3.84 (s, 3H), 3.50 – 3.32 (m, 2H), 2.25 (s, 3H).  $^{13}\text{C}$  NMR (100 MHz,  $\text{CDCl}_3$ ): (syn)  $\delta$  197.79, 172.40, 160.75, 160.12, 137.14, 136.48, 134.58, 133.37, 128.97, 128.85, 128.71, 128.68, 128.07, 127.98, 127.95, 127.66, 125.08, 120.31, 114.01, 64.22, 55.34, 45.95, 41.13, 38.35, 20.96; ES-HRMS: Calcd for  $\text{C}_{34}\text{H}_{32}\text{NO}_3$   $[\text{M}+\text{H}]^+$ , 502.2376, Found 502.2374.

The enantiomeric excess was determined by HPLC analysis. (OD-H, hexane:IPA= 85:15, flow rate:1.0 mL/min) :  $t_{\text{R}}$  10.20min (minor) ,  $t_{\text{R}}$  20.41min (major) , ee 85%



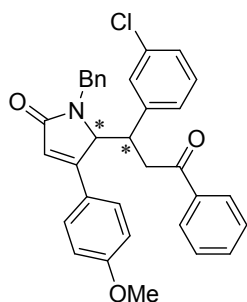

***N*-Benzyl-5-(1-(3-chlorophenyl)-3-oxo-3-phenylpropyl)-4-(4-methoxyphenyl)-1H-pyrrol-2(5H)-one (3j)**

Yield 82%, colourless oil;  $^1\text{H}$  NMR (400 MHz,  $\text{CDCl}_3$ ): (syn)  $\delta$  7.88 (d,  $J = 7.7$  Hz, 2H), 7.63 (t,  $J = 7.2$  Hz, 1H), 7.51 (t,  $J = 7.5$  Hz, 2H), 7.32 (m, 3H), 7.28 (m, 2H), 7.10 (t,  $J = 7.7$  Hz, 3H), 7.02 (t,  $J = 7.7$  Hz, 1H), 6.81 (d,  $J = 8.2$  Hz, 3H), 6.62 (d,  $J = 7.6$  Hz, 1H), 6.53 (s, 1H), 6.15 (s, 1H), 5.39 (d,  $J = 15.4$  Hz, 1H), 4.81 (s, 1H), 4.34 (d,  $J = 15.3$  Hz, 1H), 4.11 (t,  $J = 6.6$  Hz, 1H), 3.84 (s, 3H), 3.38 – 3.27 (m, 2H).  $^{13}\text{C}$  NMR (100 MHz,  $\text{CDCl}_3$ ): (syn)  $\delta$  197.25, 172.22, 160.95, 159.96, 140.01, 137.02, 136.52, 133.88, 133.58, 129.28, 128.99, 128.91, 128.75, 128.39, 128.16, 127.96, 127.84, 127.13, 126.38, 124.83, 120.69, 114.14, 64.60, 55.38, 45.92, 40.86, 37.23; ES-HRMS: Calcd for  $\text{C}_{33}\text{H}_{29}\text{ClNO}_3$   $[\text{M}+\text{H}]^+$ , 522.1830, Found 522.1830.

The enantiomeric excess was determined by HPLC analysis. (OD-H, hexane:IPA= 92:8, flow rate:1.0 mL/min) :  $t_{\text{R}}$  25.87min (minor) ,  $t_{\text{R}}$  57.63min (major) , ee 83%

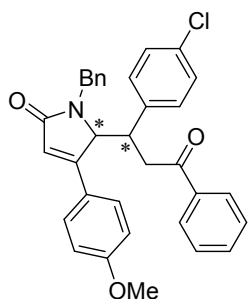

***N*-Benzyl-5-(1-(4-chlorophenyl)-3-oxo-3-phenylpropyl)-4-(4-methoxyphenyl)-1H-pyrrol-2(5H)-one (3k)**

Yield 64%, colourless oil;  $^1\text{H}$  NMR (400 MHz,  $\text{CDCl}_3$ ): (syn)  $\delta$  7.88 (d,  $J = 7.6$  Hz, 2H), 7.63 (t,  $J = 7.4$  Hz, 1H), 7.51 (t,  $J = 7.7$  Hz, 2H), 7.30 (m, 3H), 7.26 – 7.20 (m, 2H), 7.15 (d,  $J = 8.7$  Hz, 2H), 7.03 (d,  $J = 8.4$  Hz, 2H), 6.82 (d,  $J = 8.7$  Hz, 2H), 6.59 (d,  $J = 8.4$  Hz, 2H), 6.12 (s, 1H), 5.45 (d,  $J = 15.4$  Hz, 1H), 4.83 (d,  $J = 2.3$  Hz, 1H), 4.33 (d,  $J = 15.4$  Hz, 1H), 4.08 (td,  $J = 7.1, 2.4$  Hz, 1H), 3.84 (s, 3H), 3.46 – 3.30 (m, 2H).  $^{13}\text{C}$  NMR (100 MHz,  $\text{CDCl}_3$ ): (syn)  $\delta$  197.37, 172.39, 160.89, 159.91, 136.98, 136.54, 136.29, 133.58, 132.76, 129.41, 128.94, 128.89, 128.76, 128.14, 128.08, 127.94, 127.81, 124.81, 120.47, 114.14, 64.21, 55.40, 46.10, 40.92, 37.99; ES-HRMS: Calcd for  $\text{C}_{33}\text{H}_{29}\text{ClNO}_3$   $[\text{M}+\text{H}]^+$ , 522.1830, Found 522.1833.

The enantiomeric excess was determined by HPLC analysis. (OD-H, hexane:IPA=90:10, flow rate:1.0 mL/min) :  $t_{\text{R}}$  18.24min (minor) ,  $t_{\text{R}}$  38.63min (major) , ee 87%

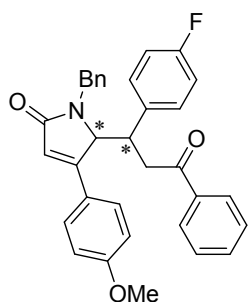

***N*-Benzyl-5-(1-(4-fluorophenyl)-3-oxo-3-phenylpropyl)-4-(4-methoxyphenyl)-1H-pyrrol-2(5*H*)-one (3l)**

Yield 55%, colourless oil;  $^1\text{H}$  NMR (400 MHz,  $\text{CDCl}_3$ ): (syn)  $\delta$  7.90 – 7.86 (m, 2H), 7.63 (t,  $J = 7.4$  Hz, 1H), 7.51 (t,  $J = 7.7$  Hz, 2H), 7.30 (m, 3H), 7.23 (m, 2H), 7.17 (d,  $J = 8.8$  Hz, 2H), 6.83 (d,  $J = 8.8$  Hz, 2H), 6.77 (t,  $J = 8.7$  Hz, 2H), 6.63 (m, 2H), 6.12 (s, 1H), 5.46 (d,  $J = 15.4$  Hz, 1H), 4.84 (d,  $J = 1.9$  Hz, 1H), 4.34 (d,  $J = 15.4$  Hz, 1H), 4.09 (td,  $J = 7.2, 2.3$  Hz, 1H), 3.84 (s, 3H), 3.43 (dd,  $J = 18.2, 7.1$  Hz, 1H), 3.36 (dd,  $J = 18.1, 7.7$  Hz, 1H).  $^{13}\text{C}$  NMR (100 MHz,  $\text{CDCl}_3$ ): (syn)  $\delta$  197.49, 172.44, 161.71(d,  $J = 244.0\text{Hz}$ ), 160.88, 160.00, 137.02, 136.60, 133.54, 129.63, 129.55, 128.92(d,  $J = 1.5\text{Hz}$ ), 128.75, 128.07, 127.94, 127.78, 124.88, 120.42, 114.97, 114.76, 114.14,

64.25, 55.39, 46.12, 40.81, 38.34; ES-HRMS: Calcd for  $C_{33}H_{29}FNO_3$   $[M+H]^+$ , 506.2126, Found 506.2126.

The enantiomeric excess was determined by HPLC analysis. (OD-H, hexane:IPA= 85:15, flow rate:1.0 mL/min) :  $t_R$  13.20min (minor) ,  $t_R$  29.05min (major) , ee 85%

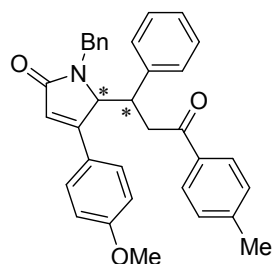

***N*-Benzyl-5-(3-oxo-1-phenyl-3-(*p*-tolyl)propyl)-4-(4-methoxyphenyl)-1H-pyrrol-2(5*H*)-one (3m)**

Yield 69%; colourless oil;  $^1H$  NMR (400 MHz,  $CDCl_3$ ): (syn)  $\delta$  7.81 (d,  $J = 8.2$  Hz, 2H), 7.39 (d,  $J = 8.7$  Hz, 2H), 7.34 – 7.04 (m, 12H), 6.81 (m, 2H), 6.11 (s, 1H), 5.48 (d,  $J = 15.4$  Hz, 1H), 4.89 (d,  $J = 1.9$  Hz, 1H), 4.35 (d,  $J = 15.4$  Hz, 1H), 4.15 (m, 1H), 3.82 (s, 3H), 3.38 (m, 2H), 2.45 (s, 3H).  $^{13}C$  NMR (100 MHz,  $CDCl_3$ ): (syn)  $\delta$  197.33, 172.37, 160.75, 160.17, 144.28, 137.86, 137.18, 134.31, 129.38, 128.94, 128.88, 128.45, 128.16, 128.09, 127.96, 127.70, 126.91, 125.04, 120.37, 114.05, 64.31, 55.35, 45.91, 41.41, 37.85, 21.70; ES-HRMS: Calcd for  $C_{34}H_{32}NO_3$   $[M+H]^+$ , 502.2376, Found 502.2373.

The enantiomeric excess was determined by HPLC analysis. (OD-H, hexane:IPA= 95:5, flow rate:1.0 mL/min) :  $t_R$  39.43min (minor) ,  $t_R$  93.11min (major) , ee 84%

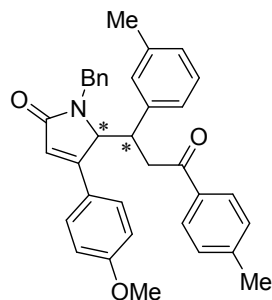

***N*-Benzyl-5-(1-(3-bromophenyl)-3-oxo-3-(*p*-tolyl)propyl)-4-(4-methoxyphenyl)-1H-pyrrol-2(5*H*)-one (3n)**

Yield 66%; colourless oil ;  $^1\text{H NMR}$  (400 MHz,  $\text{CDCl}_3$ ): (syn+anti)  $\delta$  7.81 (d,  $J = 8.0$  Hz, 1H), 7.74 (d,  $J = 8.0$  Hz, 1H), 7.38 (t,  $J = 12.4$  Hz, 1H), 7.35 – 7.27 (m, 3H), 7.22 (dd,  $J = 11.2, 8.6$  Hz, 2H), 7.10 (d,  $J = 8.8$  Hz, 1H), 6.99 – 6.87 (m, 2H), 6.78 (t,  $J = 7.3$  Hz, 2H), 6.53 (d,  $J = 7.4$  Hz, 0H), 6.38 (s, 0H), 6.27 (s, 0H), 6.13 (s, 0H), 5.43 (d,  $J = 15.3$  Hz, 0H), 5.23 (d,  $J = 14.9$  Hz, 0H), 4.84 (s, 1H), 4.35 (d,  $J = 15.3$  Hz, 0H), 4.21 – 4.03 (m, 1H), 3.82 (dd,  $J = 13.1, 8.6$  Hz, 3H), 3.50 (dd,  $J = 17.8, 9.3$  Hz, 0H), 3.33 (d,  $J = 7.2$  Hz, 1H), 2.94 (dd,  $J = 17.8, 5.0$  Hz, 0H), 2.45 (s, 1H), 2.42 (s, 1H).  $^{13}\text{C NMR}$  (100 MHz,  $\text{CDCl}_3$ ): (syn+anti)  $\delta$  197.37, 197.13, 172.23, 172.15, 161.15, 160.69, 160.26, 159.15, 144.22, 144.10, 139.65, 138.16, 137.81, 137.41, 137.36, 137.27, 134.34, 134.17, 129.36, 129.28, 128.97, 128.91, 128.88, 128.86, 128.44, 128.39, 128.24, 128.18, 128.15, 128.10, 127.92, 127.90, 127.69, 127.61, 127.31, 125.28, 125.22, 124.80, 121.21, 120.53, 114.58, 113.89, 65.35, 64.79, 55.40, 55.33, 45.73, 45.05, 41.04, 40.80, 37.28, 34.95, 21.70, 21.65, 21.52, 21.29; ES-HRMS: Calcd for  $\text{C}_{34}\text{H}_{31}\text{BrNO}_3$   $[\text{M}+\text{H}]^+$ , 516.2533, Found 516.2534.

The enantiomeric excess was determined by HPLC analysis. (OD-H, hexane:IPA= 85:15, flow rate:1.0 mL/min) :  $t_{\text{R}}$  9.88min (minor) ,  $t_{\text{R}}$  18.34min (major) , ee 85%

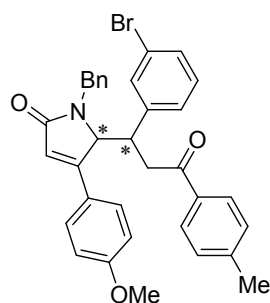

***N*-Benzyl-5-(1-(3-bromophenyl)-3-oxo-3-(*p*-tolyl)propyl)-4-(4-methoxyphenyl)-1H-pyrrol-2(5*H*)-one (3o)**

Yield 64%, colourless oil;  $^1\text{H NMR}$  (400 MHz,  $\text{CDCl}_3$ ): (syn)  $\delta$  7.78 (d,  $J = 8.0$  Hz, 2H), 7.37 – 7.20 (m, 8H), 7.11 (d,  $J = 8.5$  Hz, 2H), 6.96 (t,  $J = 8.0$  Hz, 1H), 6.81 (d,  $J$

= 8.6 Hz, 2H), 6.66 (d,  $J = 6.5$  Hz, 2H), 6.14 (s, 1H), 5.37 (d,  $J = 15.3$  Hz, 1H), 4.81 (s, 1H), 4.38 – 4.27 (d,  $J = 15.3$  Hz, 1H), 4.08 (td,  $J = 7.0, 2.2$  Hz, 1H), 3.84 (s, 3H), 3.37 – 3.21 (m, 2H), 2.46 (s, 3H).  $^{13}\text{C}$  NMR (100 MHz,  $\text{CDCl}_3$ ): (syn)  $\delta$  196.85, 172.26, 160.94, 160.01, 144.47, 140.40, 137.07, 134.08, 131.31, 130.01, 129.54, 129.42, 128.98, 128.91, 128.20, 128.09, 127.82, 126.84, 124.85, 122.12, 120.69, 114.14, 64.66, 55.37, 45.95, 40.90, 37.05, 21.71, 1.02; ES-HRMS: Calcd for  $\text{C}_{34}\text{H}_{31}\text{BrNO}_3$   $[\text{M}+\text{H}]^+$ , 580.1481, Found 580.1478.

The enantiomeric excess was determined by HPLC analysis. (OD-H, hexane:IPA= 85:15, flow rate:1.0 mL/min) :  $t_{\text{R}}$  13.07min (minor) ,  $t_{\text{R}}$  23.90min (major) , ee 86%

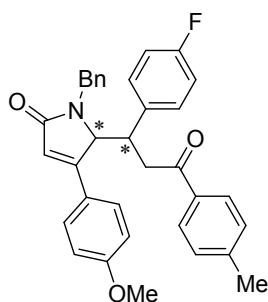

***N*-Benzyl-5-(1-(4-fluorophenyl)-3-oxo-3-(*p*-tolyl)propyl)-4-(4-methoxyphenyl)-1*H*-pyrrol-2(5*H*)-one (3p)**

Yield 90%, colourless oil;  $^1\text{H}$  NMR (400 MHz,  $\text{CDCl}_3$ ): (syn)  $\delta$  7.77 (t,  $J = 16.7$  Hz, 2H), 7.30 (m, 5H), 7.26 – 7.21 (m, 2H), 7.18 (d,  $J = 8.8$  Hz, 2H), 6.83 (d,  $J = 8.8$  Hz, 2H), 6.76 (m,  $J = 8.6$  Hz, 2H), 6.63 (m, 2H), 6.11 (s, 1H), 5.45 (d,  $J = 15.4$  Hz, 1H), 4.84 (d,  $J = 2.2$  Hz, 1H), 4.33 (d,  $J = 15.4$  Hz, 1H), 4.07 (dt,  $J = 20.2, 10.1$  Hz, 1H), 3.84 (s, 3H), 3.37 (m, 2H), 2.46 (s, 3H).  $^{13}\text{C}$  NMR (100 MHz,  $\text{CDCl}_3$ ): (syn)  $\delta$  197.12, 172.50, 160.87, 160.06, 144.44, 137.06, 134.16, 133.55, 129.64, 129.56, 129.42, 128.91, 128.10, 128.07, 127.76, 124.90, 120.37, 114.93, 114.72, 114.12, 64.25, 55.38, 46.15, 40.87, 38.24, 21.70; ES-HRMS: Calcd for  $\text{C}_{34}\text{H}_{31}\text{FNO}_3$   $[\text{M}+\text{H}]^+$ , 520.2282, Found 520.2283.

The enantiomeric excess was determined by HPLC analysis. (OD-H, hexane:IPA= 92:8, flow rate:1.0 mL/min) :  $t_R$  20.47min (minor) ,  $t_R$  50.49min (major) , ee 87%

#### **c NMR Spectra**

**$^1\text{H}$  NMR and  $^{13}\text{C}$  NMR spectra of 3a**

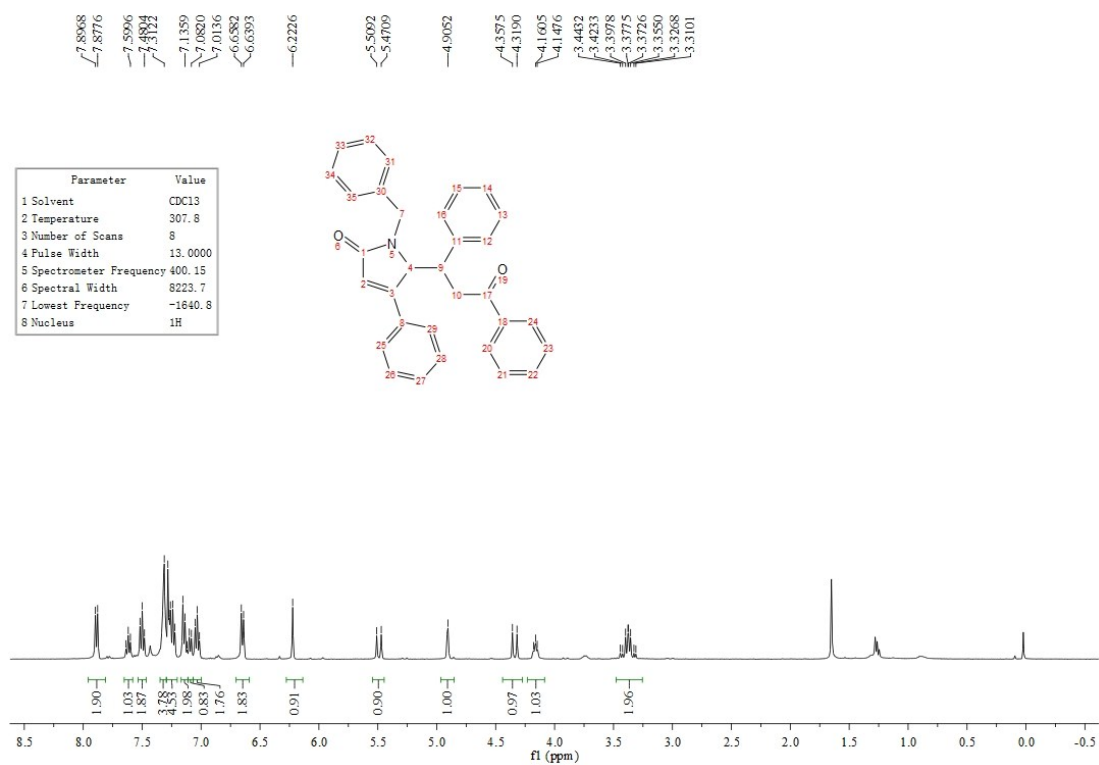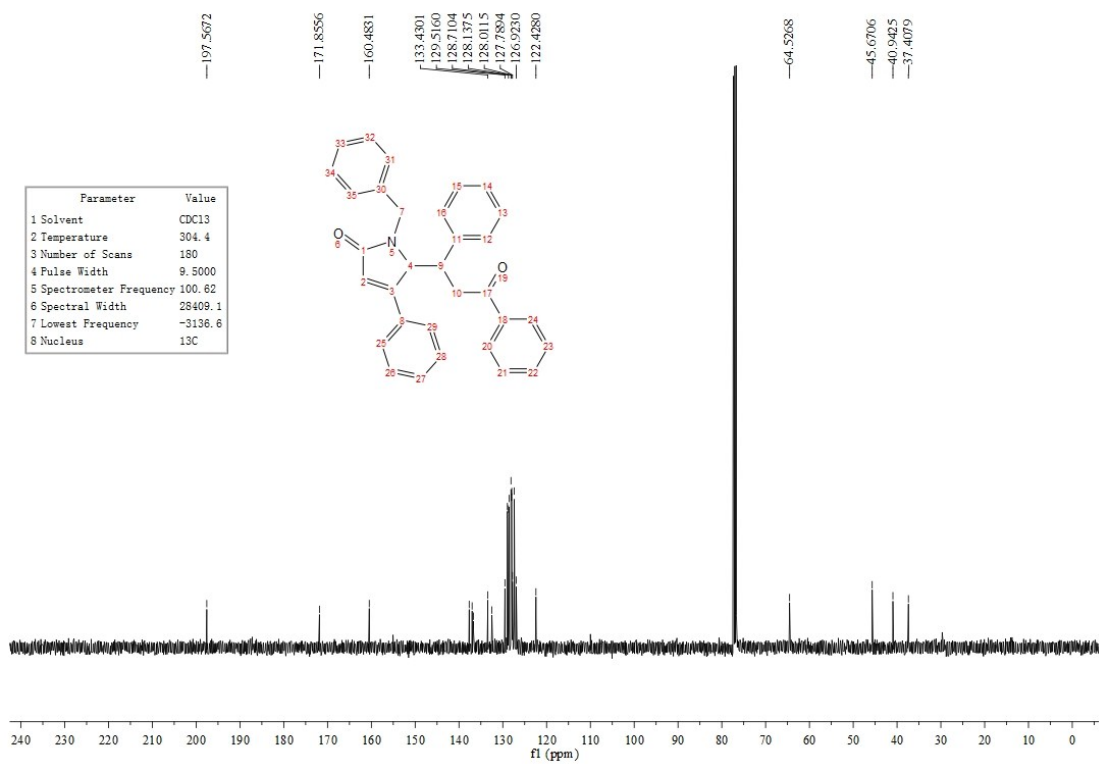

**<sup>1</sup>H NMR and <sup>13</sup>C NMR spectra of 3b**

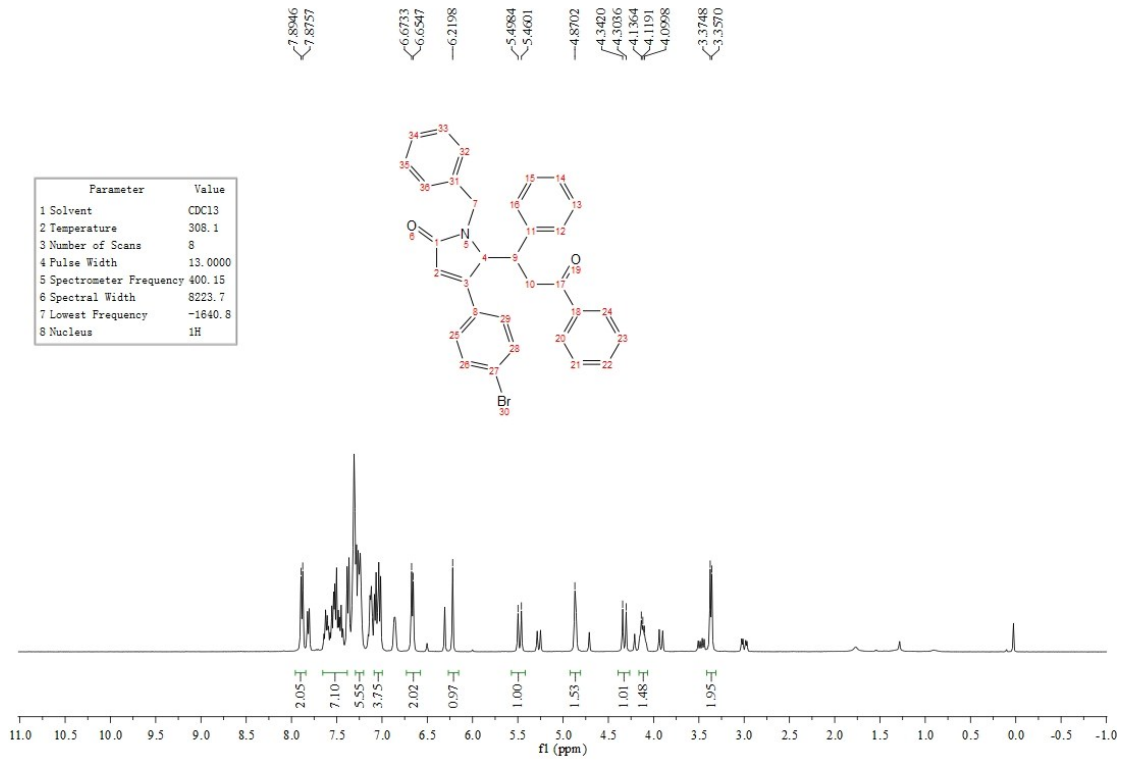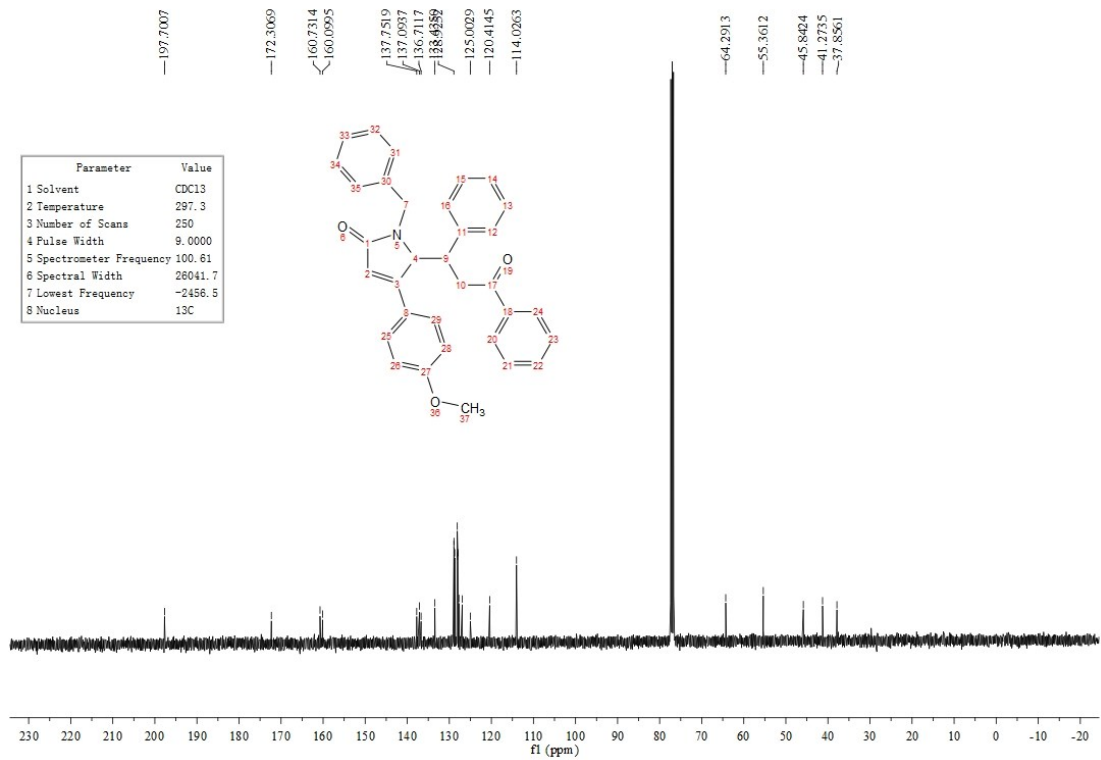

<sup>1</sup>H NMR and <sup>13</sup>C NMR spectra of 3c



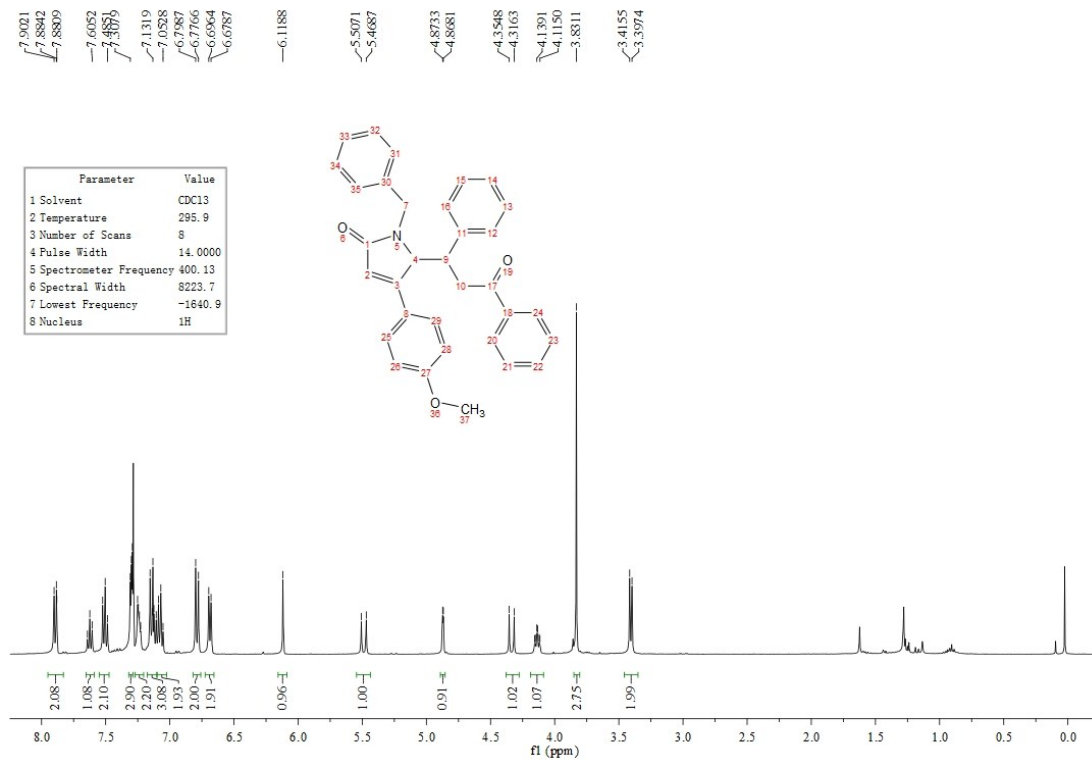

**<sup>1</sup>H NMR and <sup>13</sup>C NMR spectra of 3d**

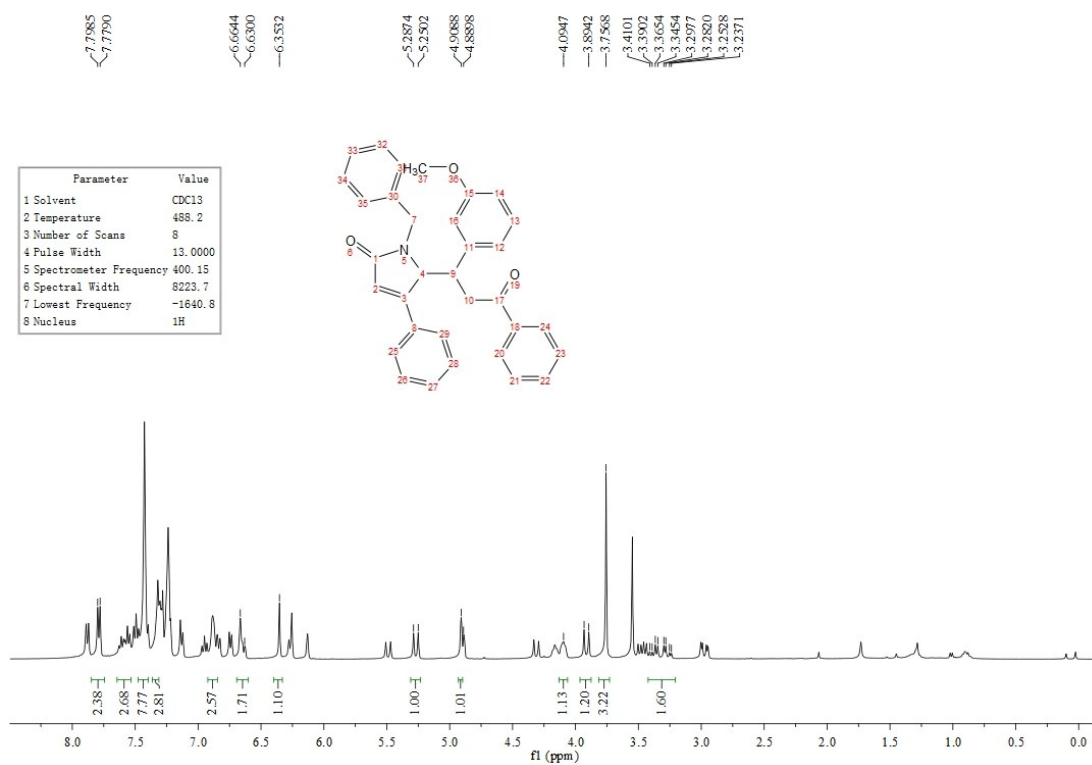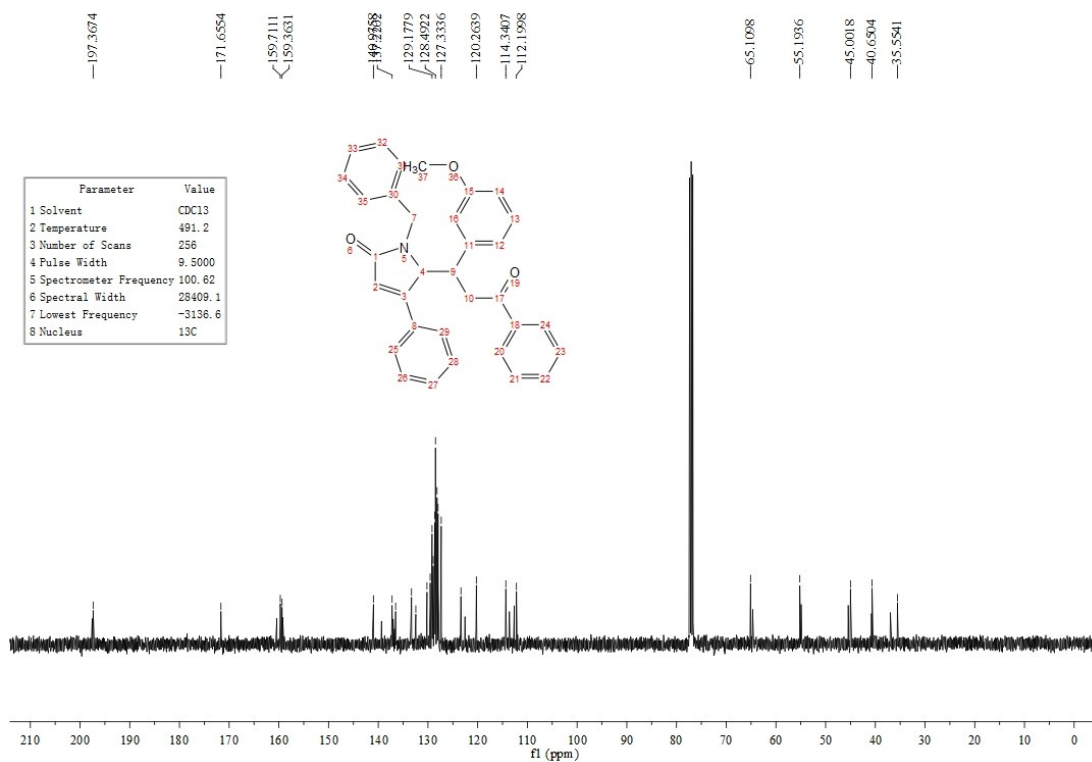

<sup>1</sup>H NMR and <sup>13</sup>C NMR spectra of 3e

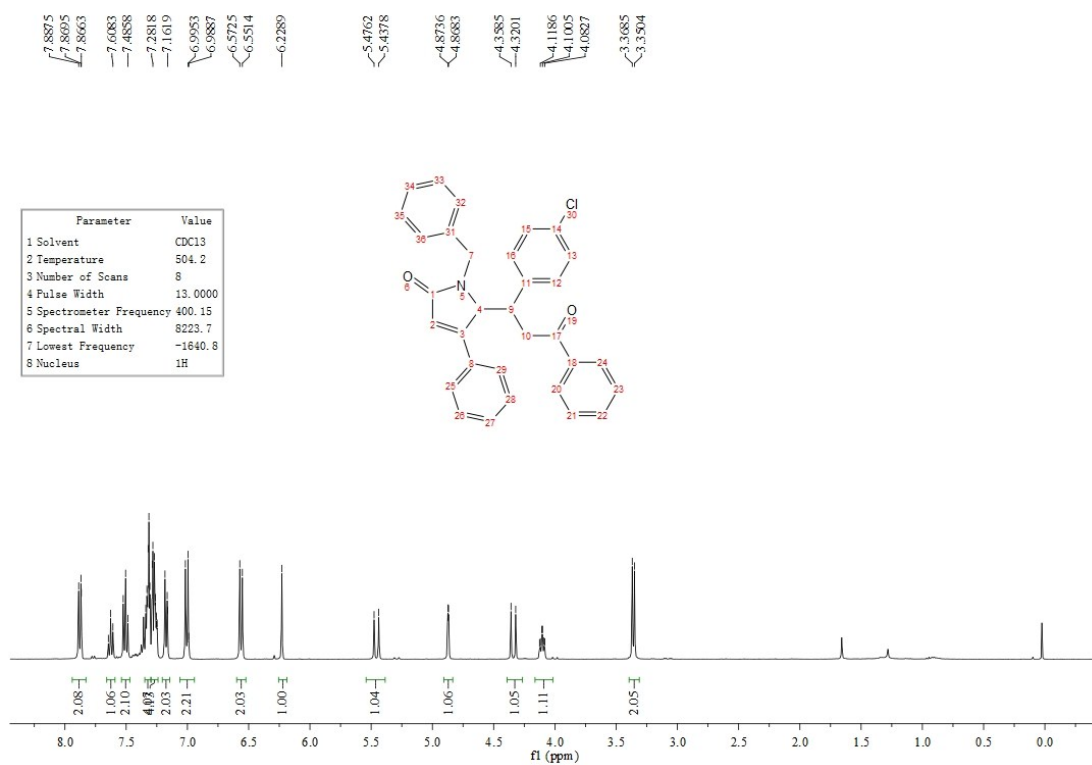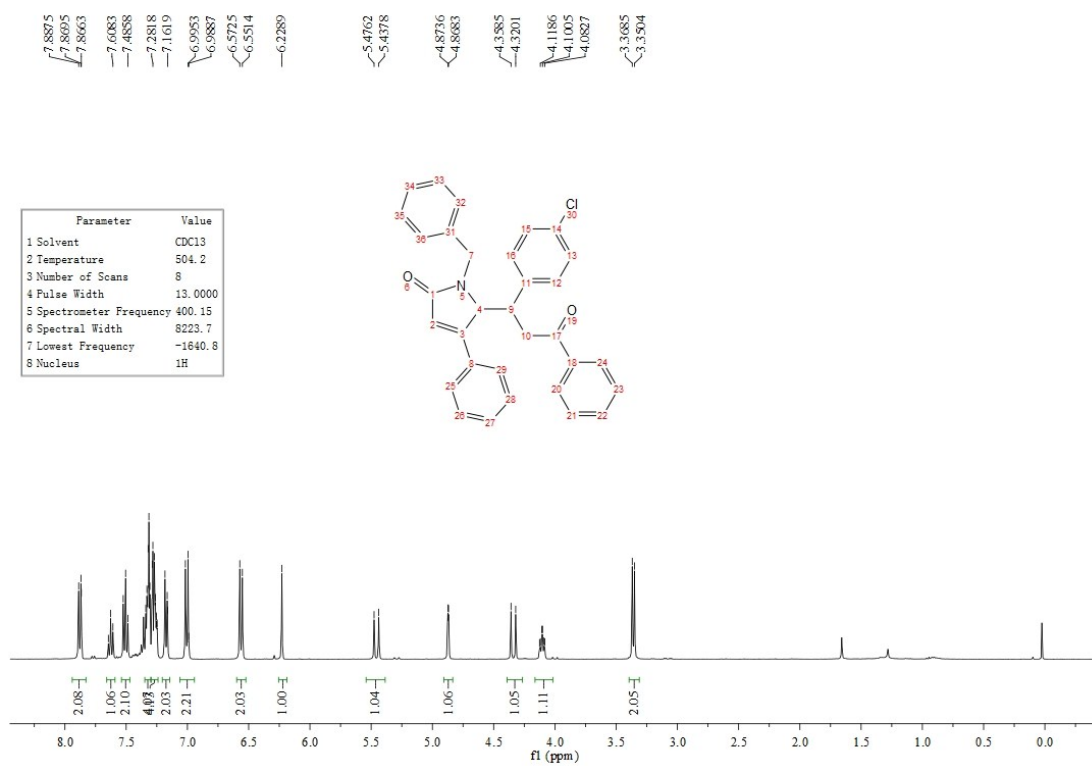

**<sup>1</sup>H NMR and <sup>13</sup>C NMR spectra of 3f**

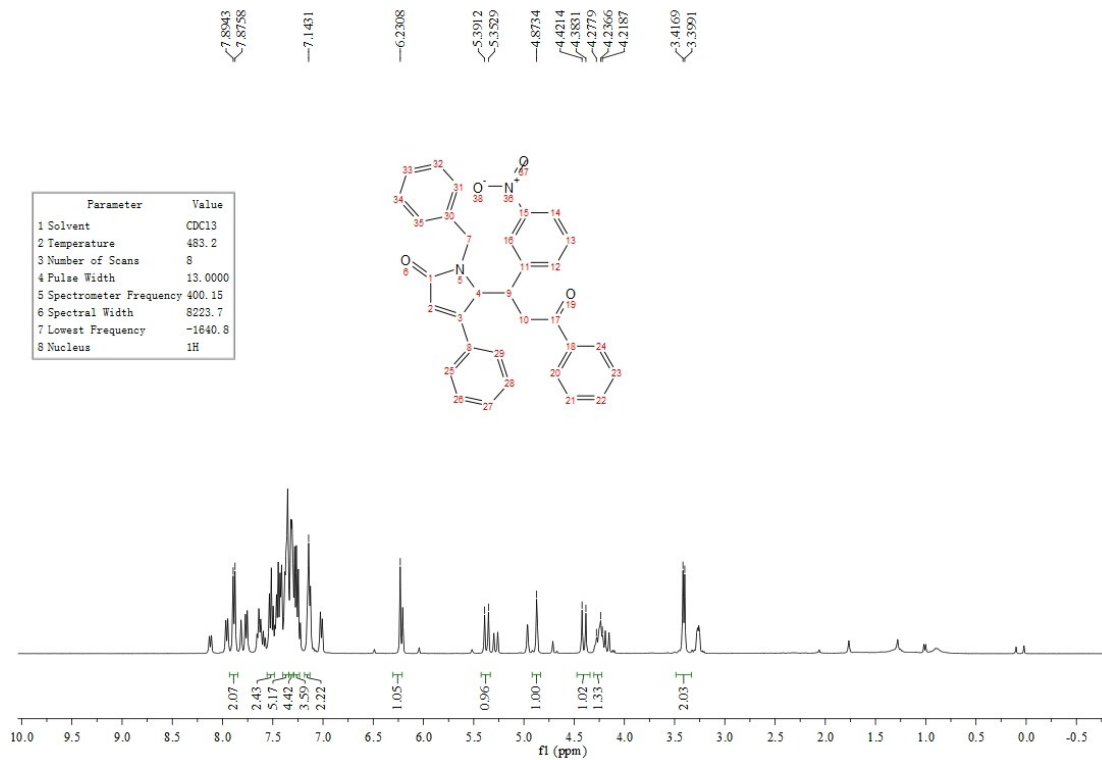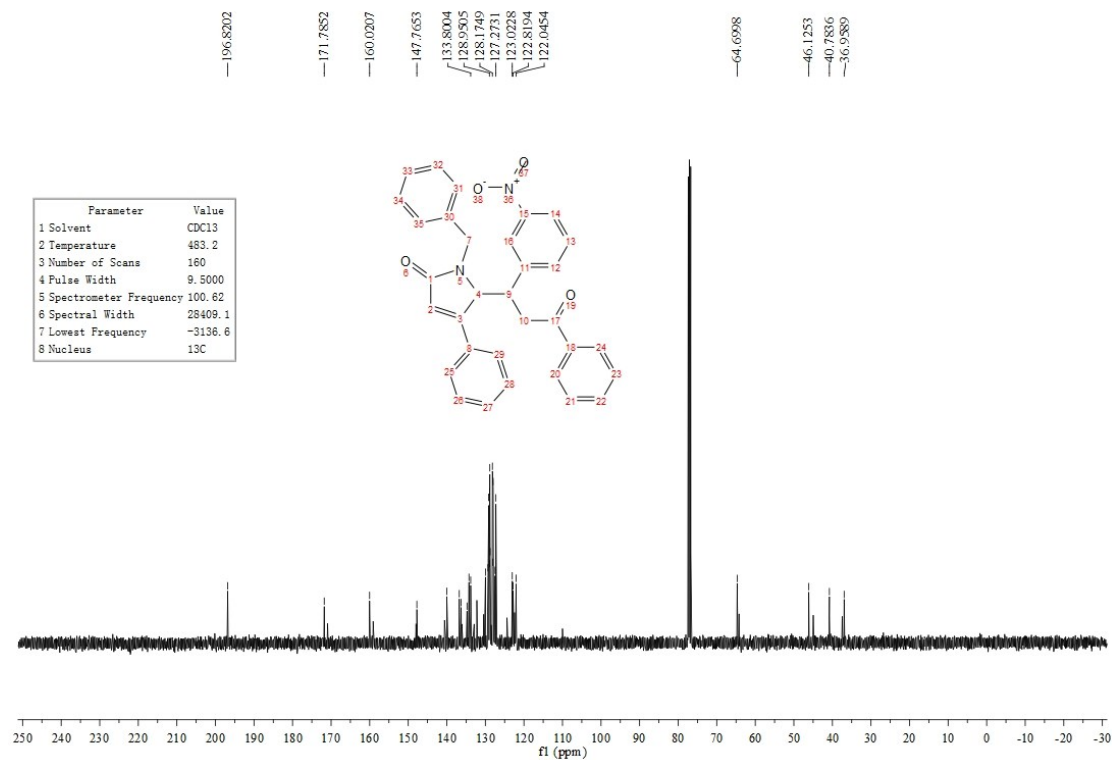

**<sup>1</sup>H NMR and <sup>13</sup>C NMR spectra of 3g**

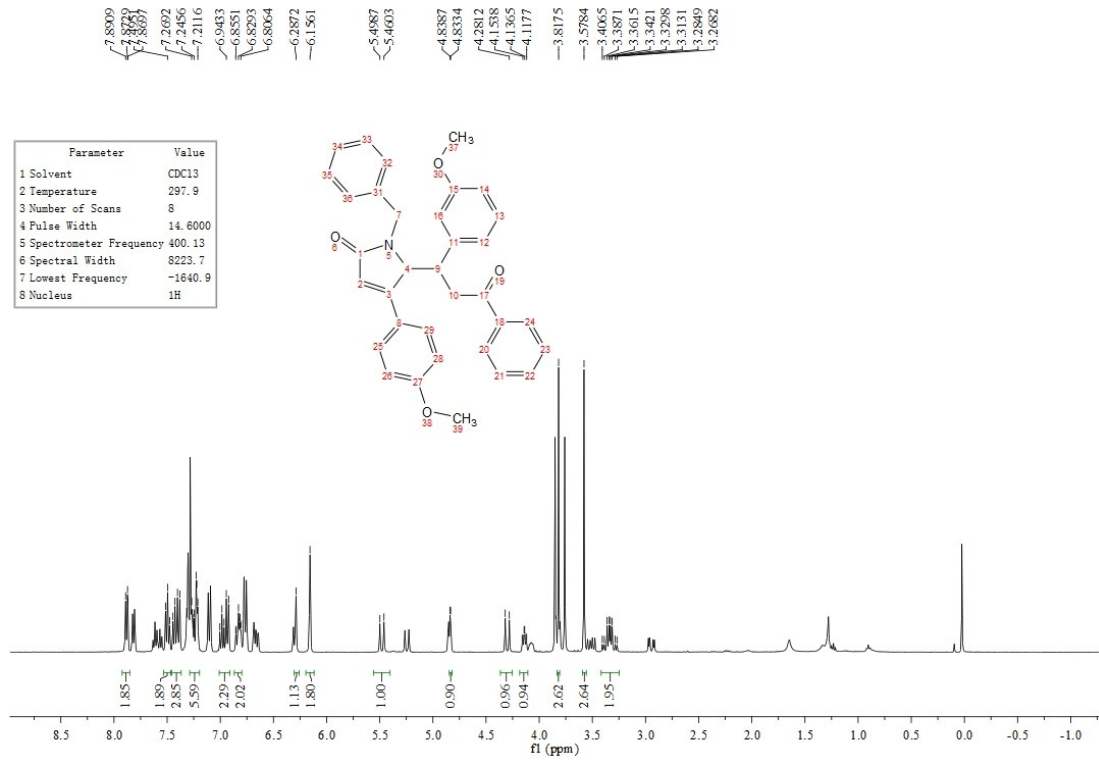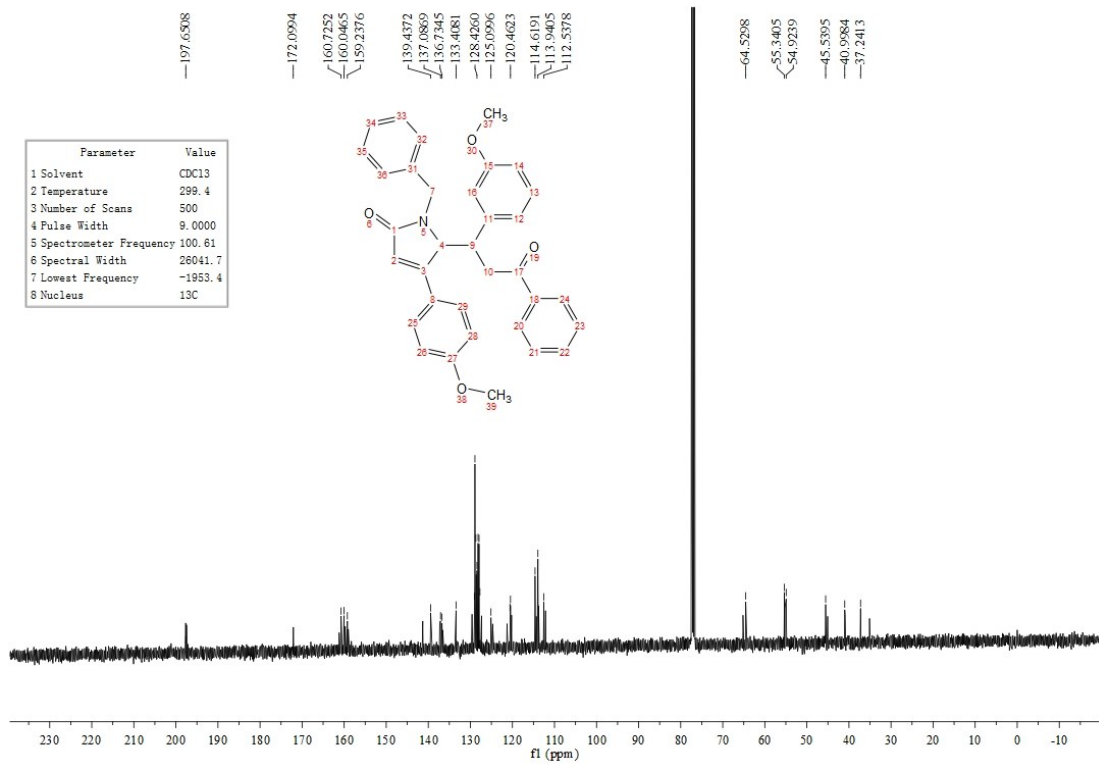

## <sup>1</sup>H NMR and <sup>13</sup>C NMR spectra of 3h

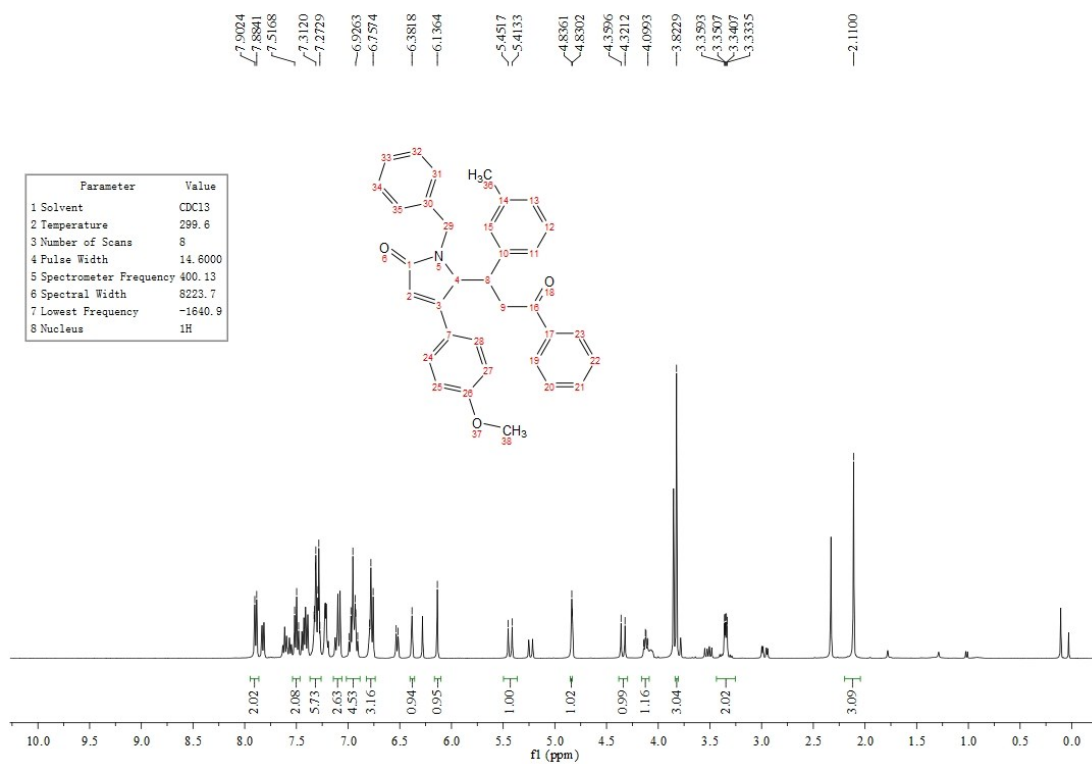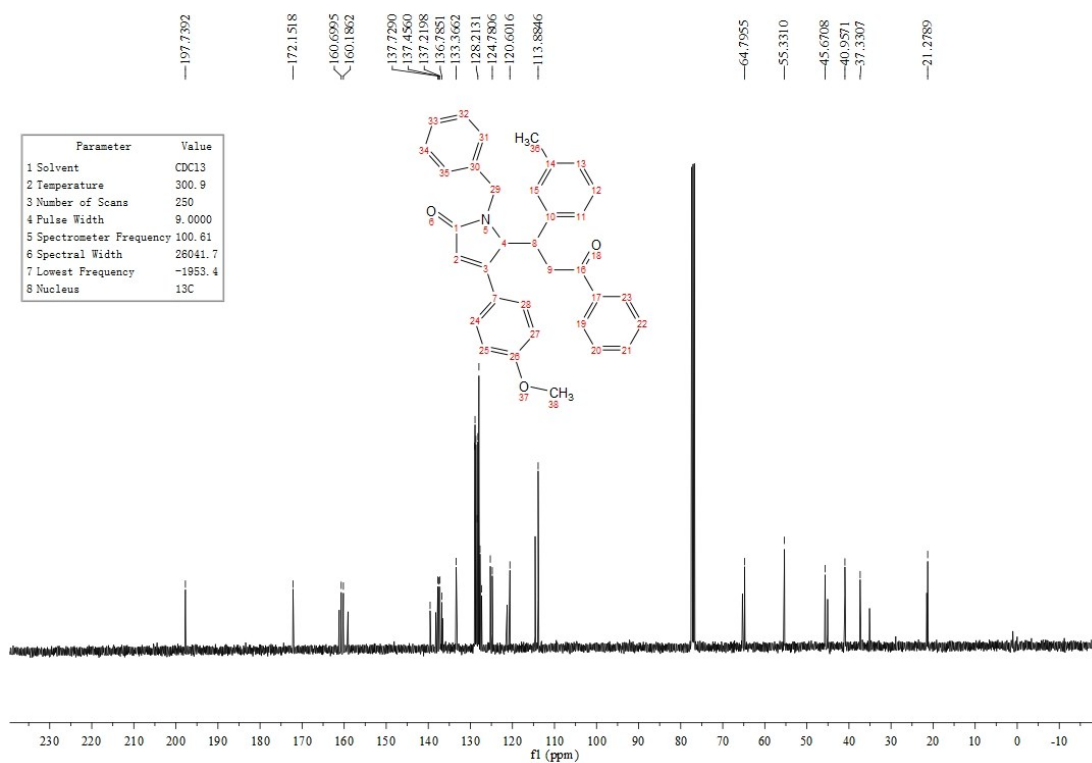

## <sup>1</sup>H NMR and <sup>13</sup>C NMR spectra of 3i

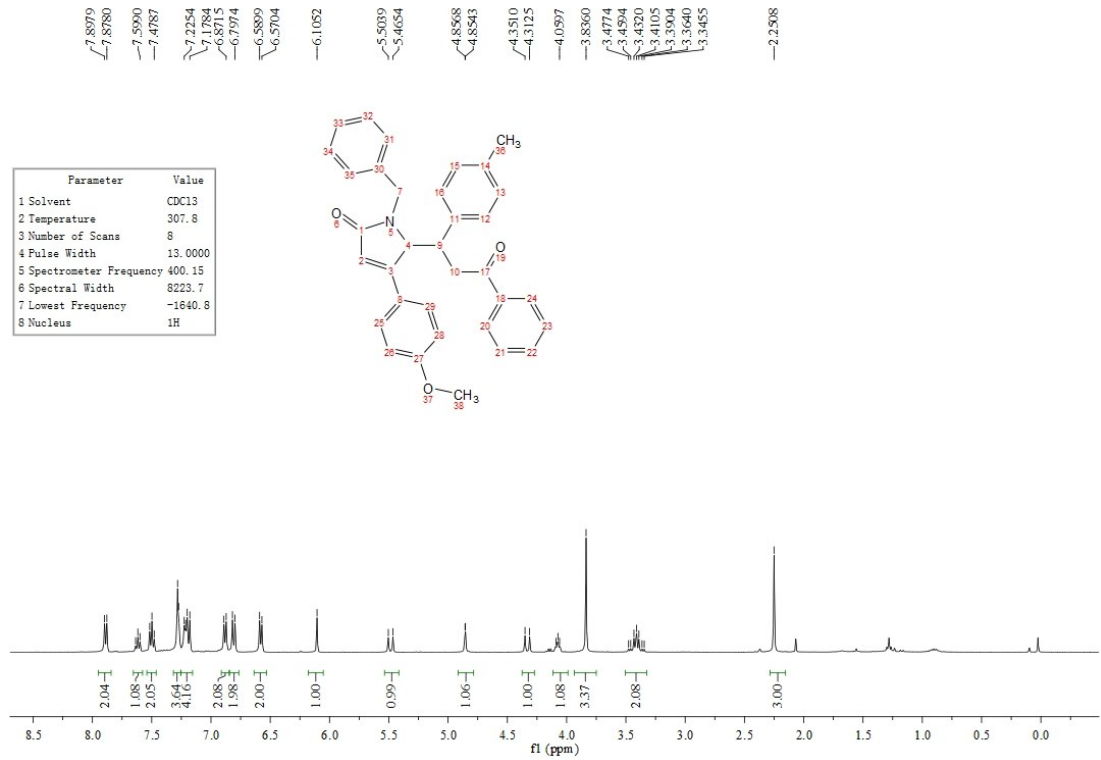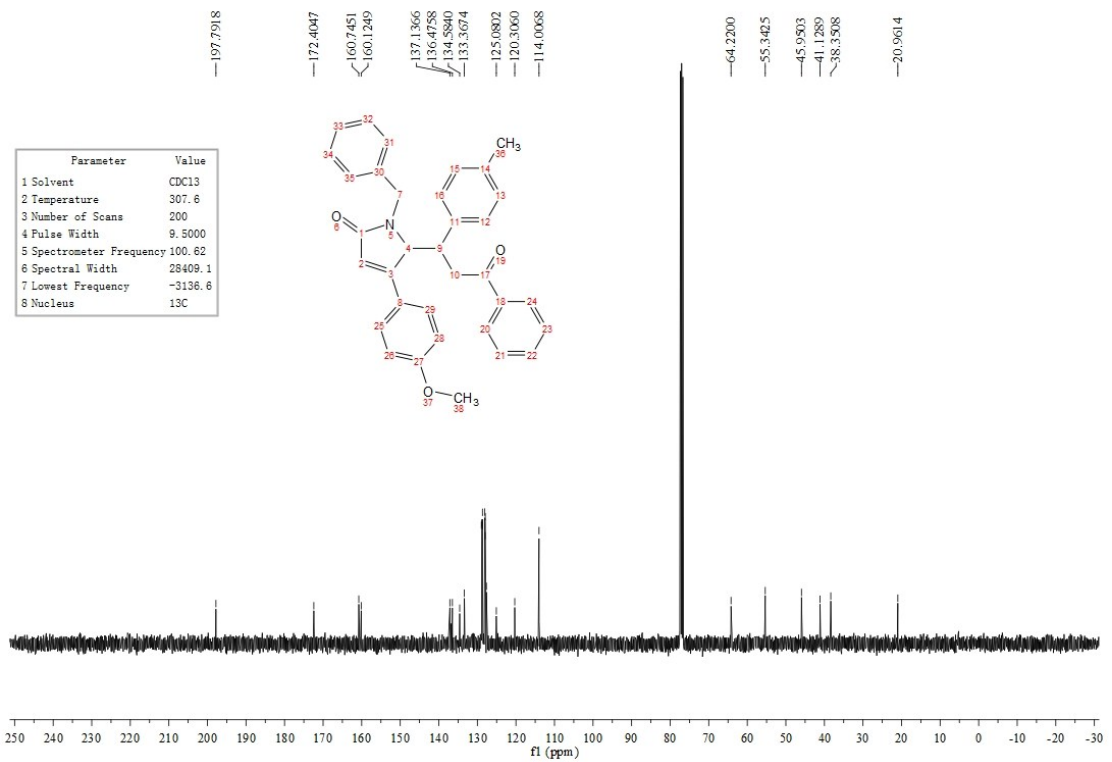

# <sup>1</sup>H NMR and <sup>13</sup>C NMR spectra of 3j

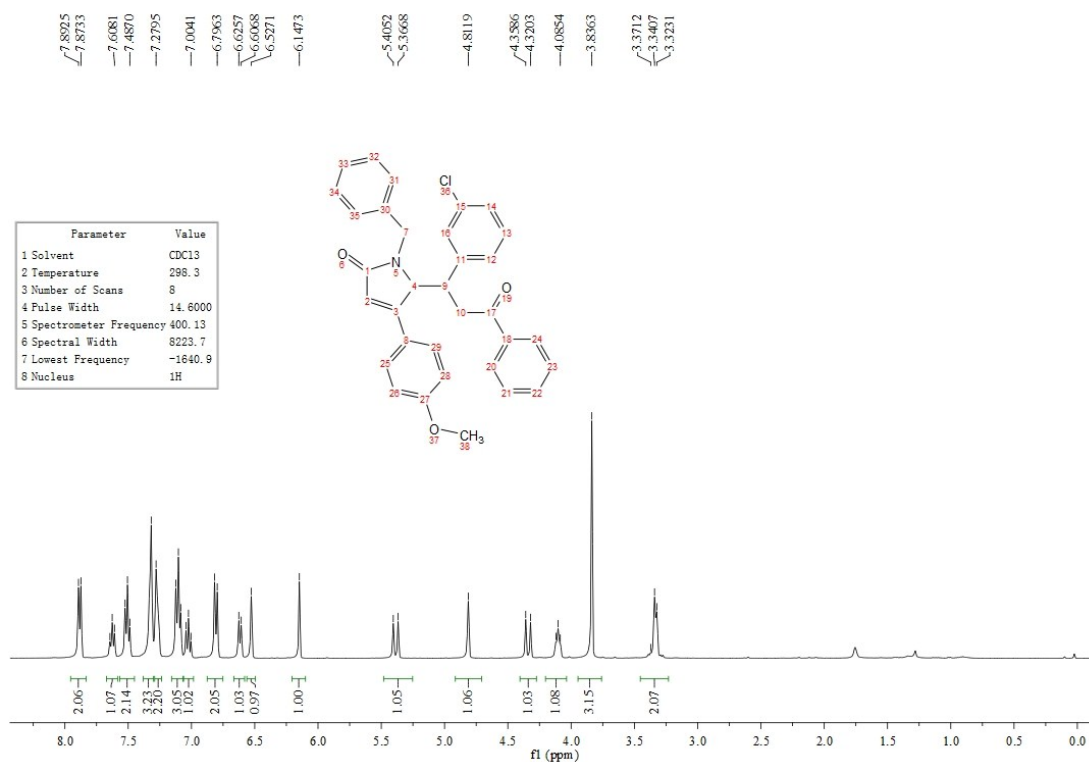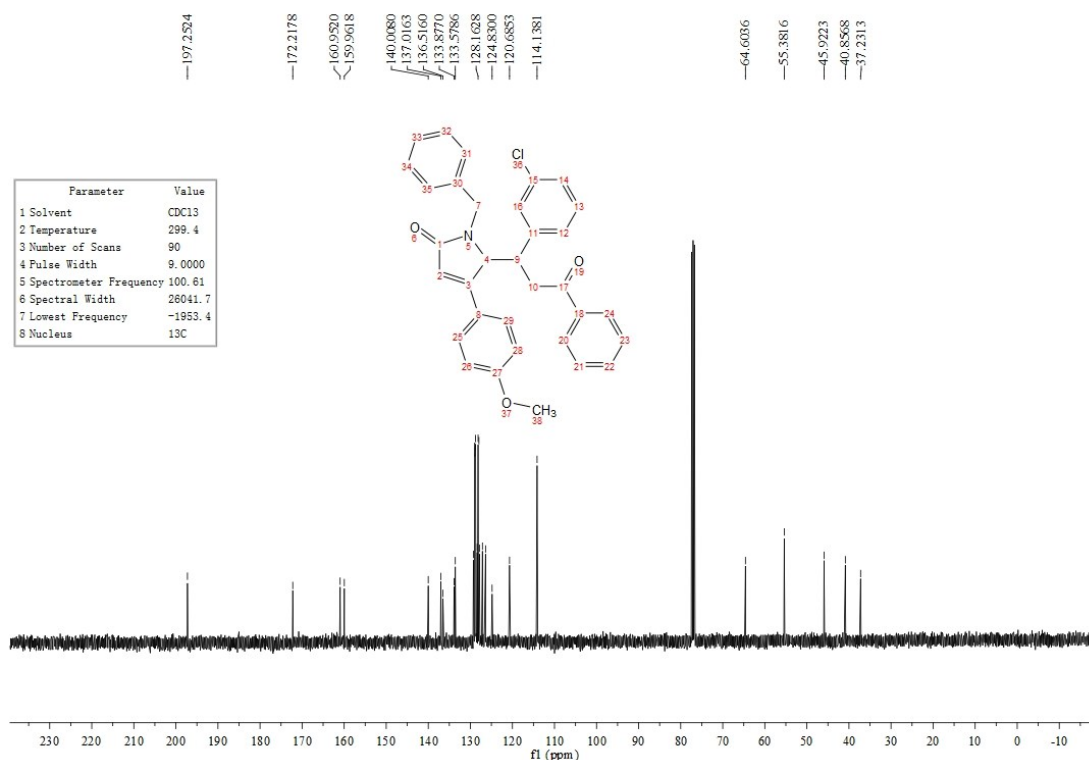



# <sup>1</sup>H NMR and <sup>13</sup>C NMR spectra of 3k

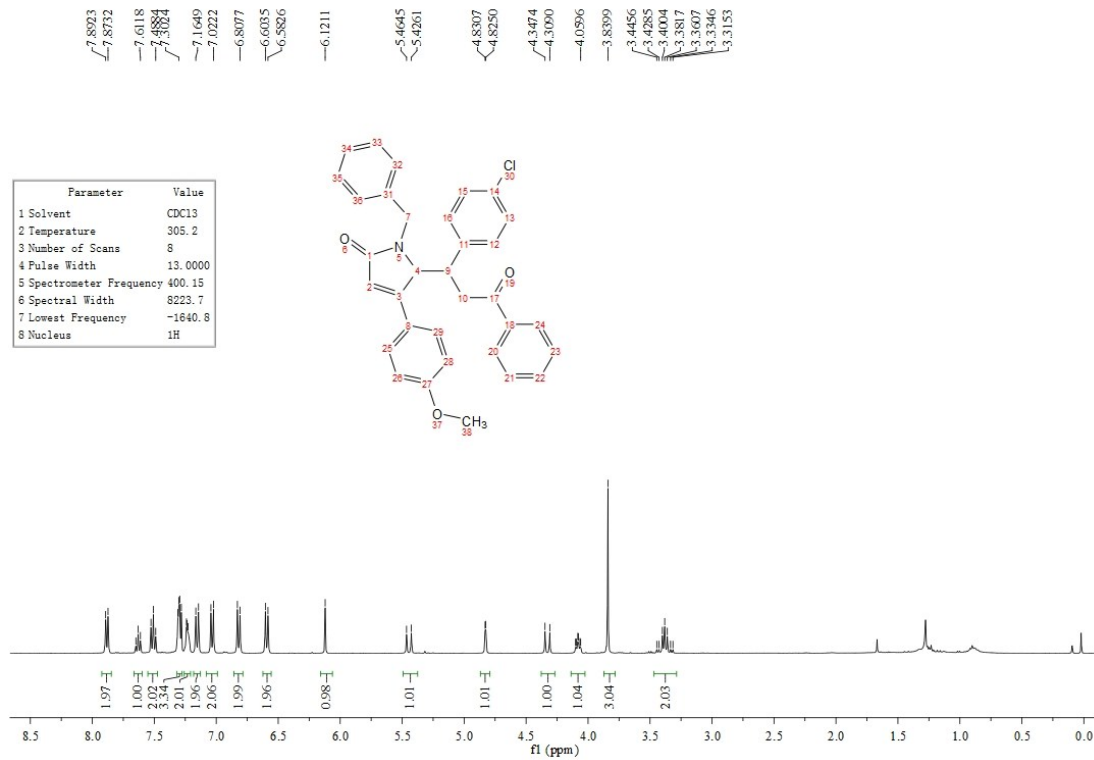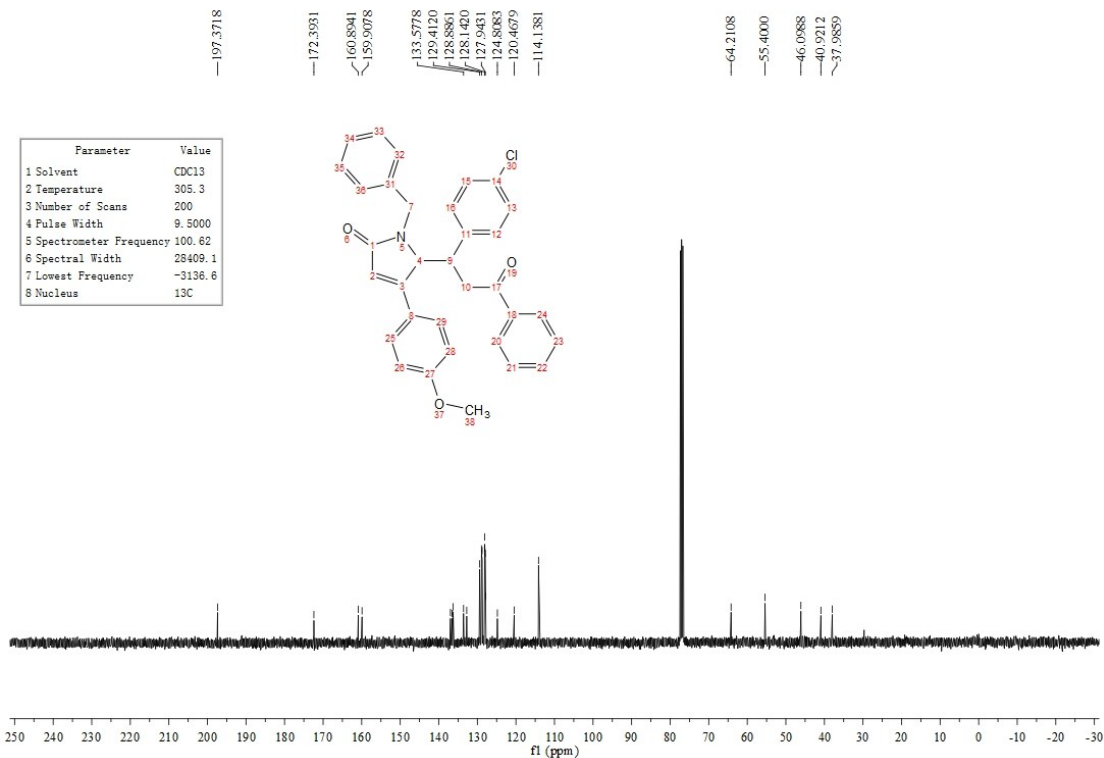

## <sup>1</sup>H NMR and <sup>13</sup>C NMR spectra of 3l

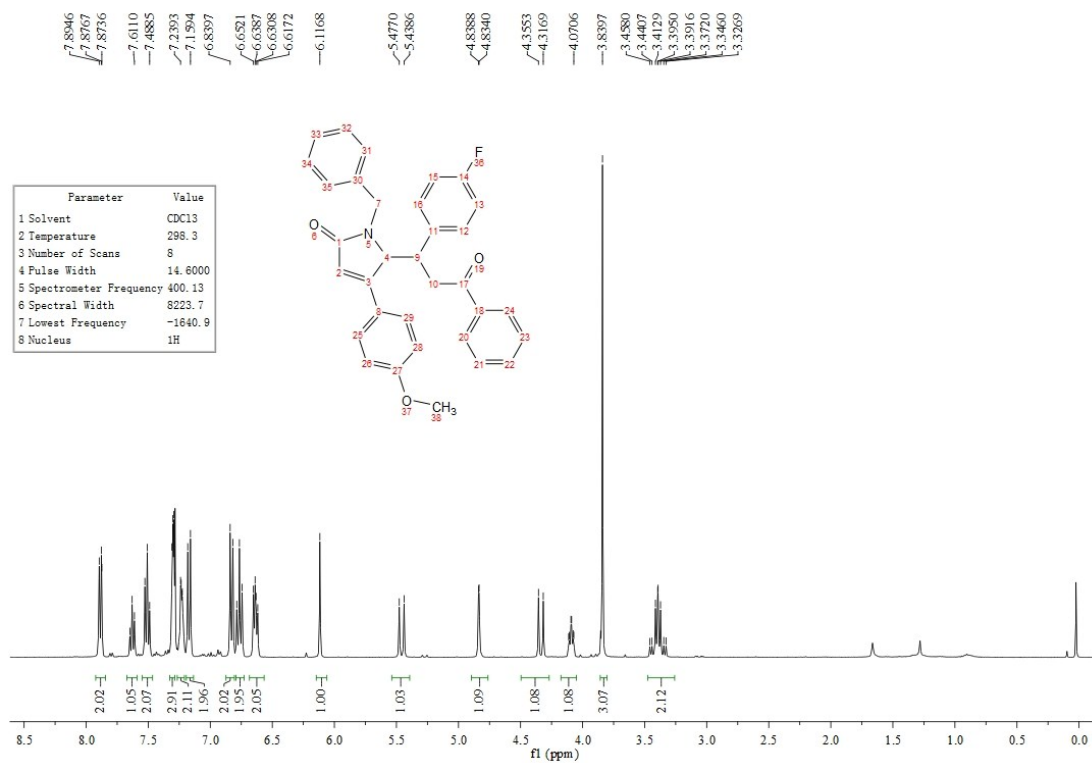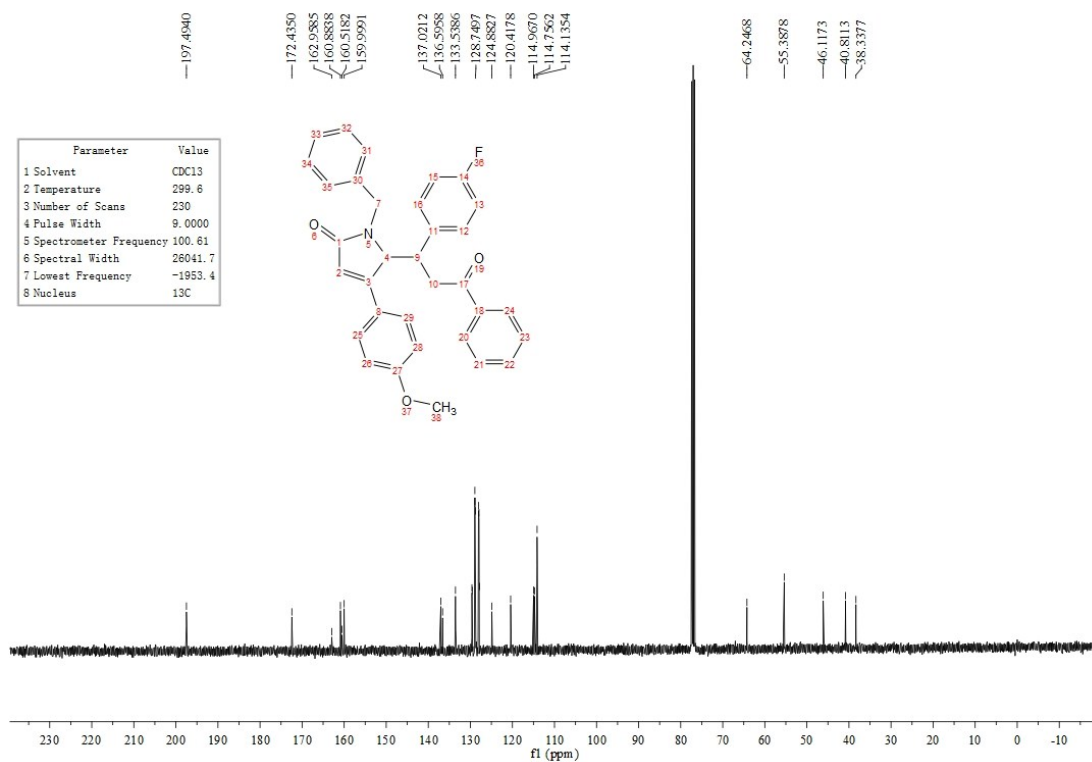

## <sup>1</sup>H NMR and <sup>13</sup>C NMR spectra of 3m

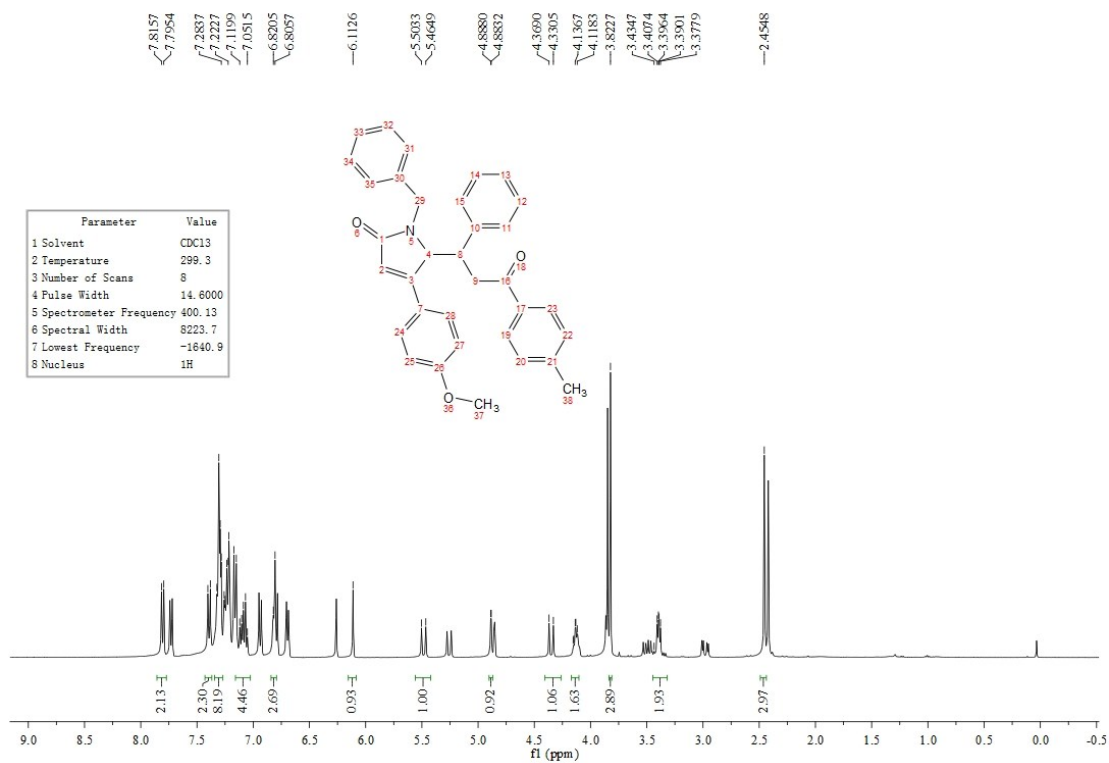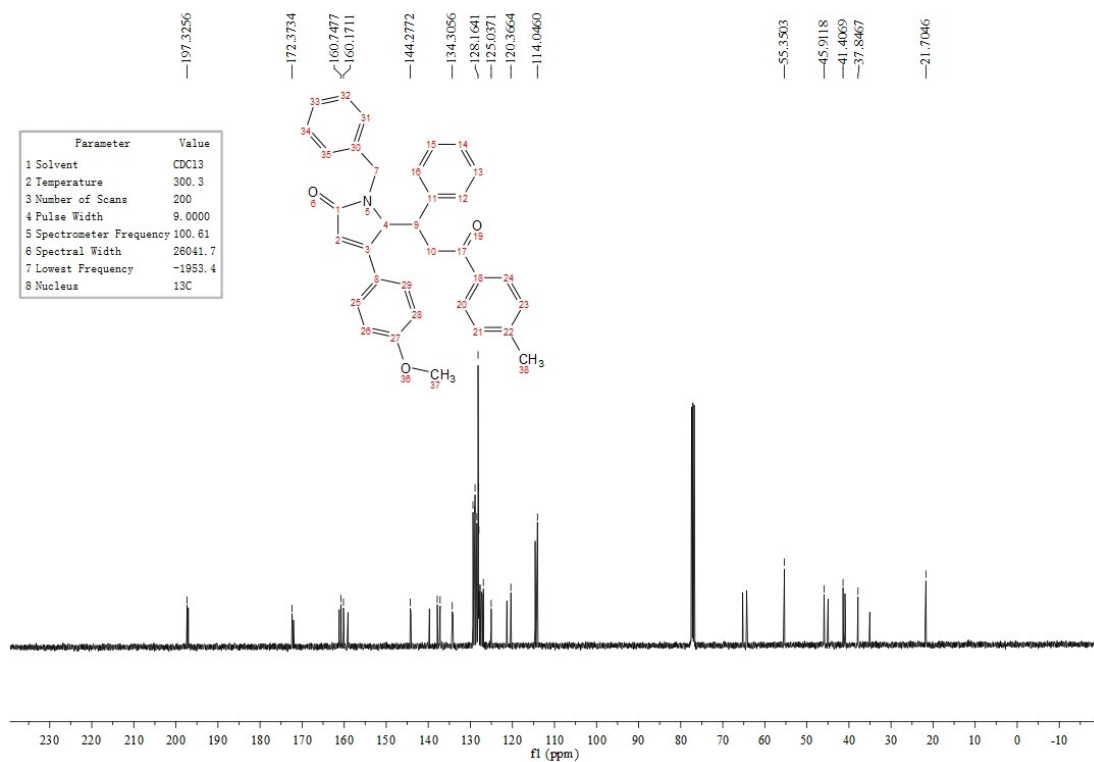

**<sup>1</sup>H NMR and <sup>13</sup>C NMR spectra of 3n**

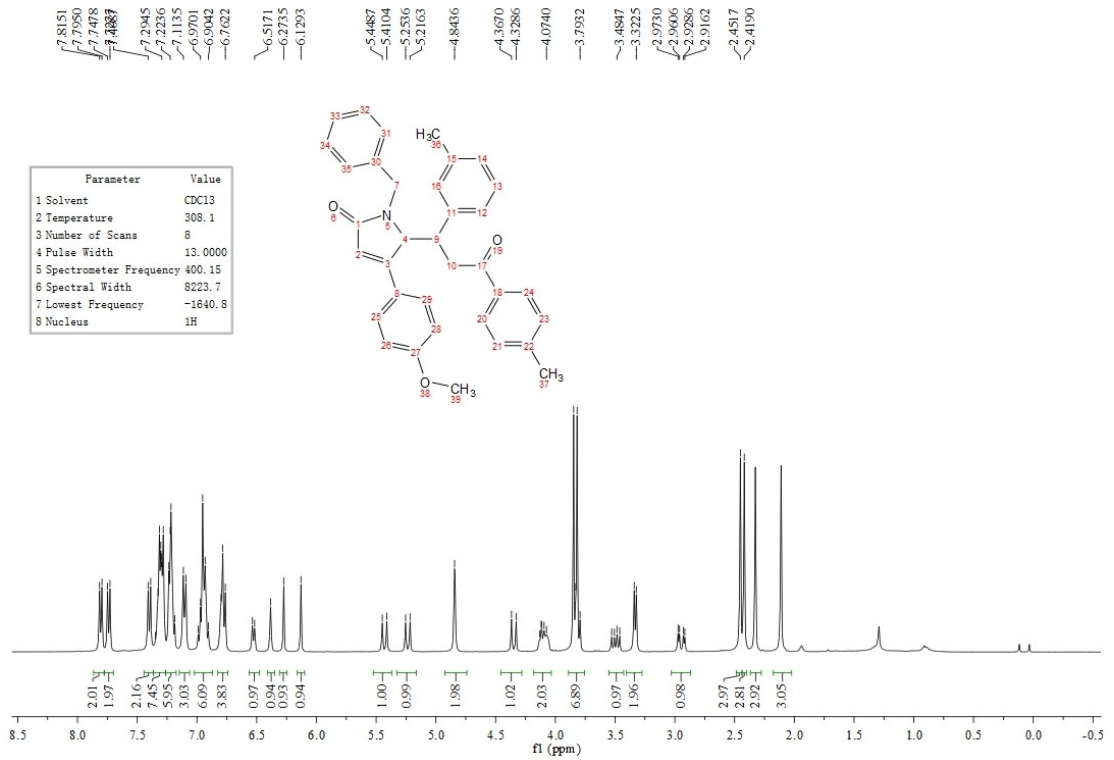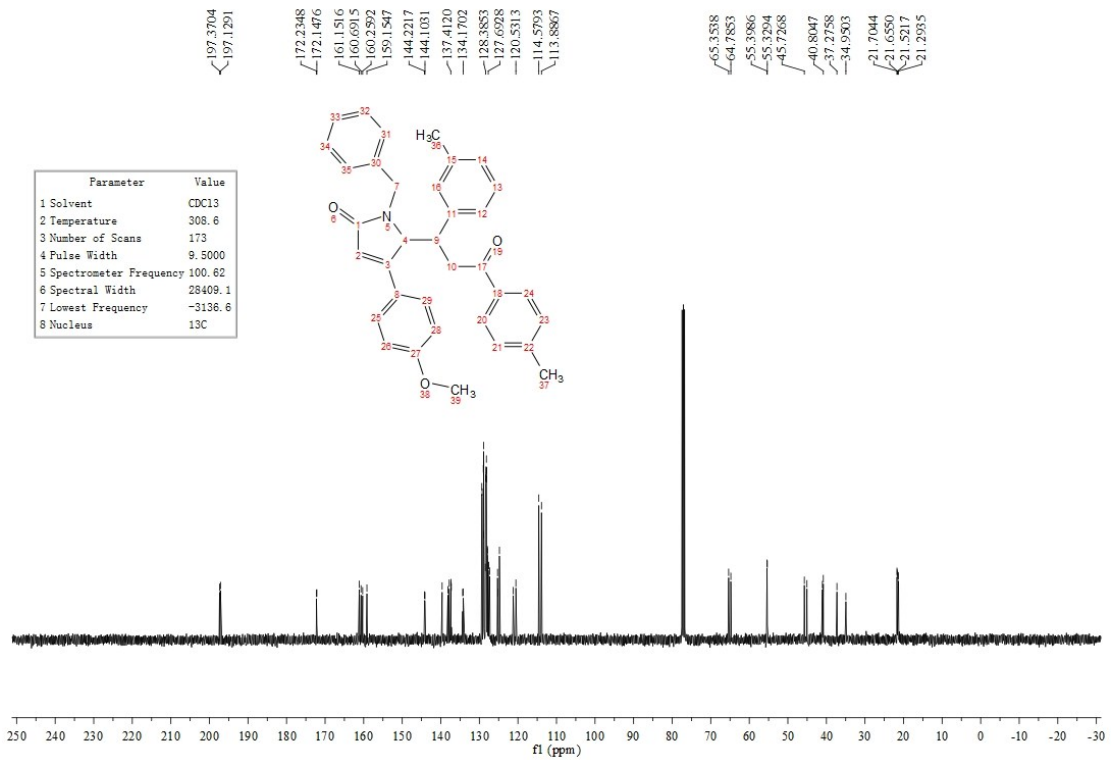

# <sup>1</sup>H NMR and <sup>13</sup>C NMR spectra of 3o

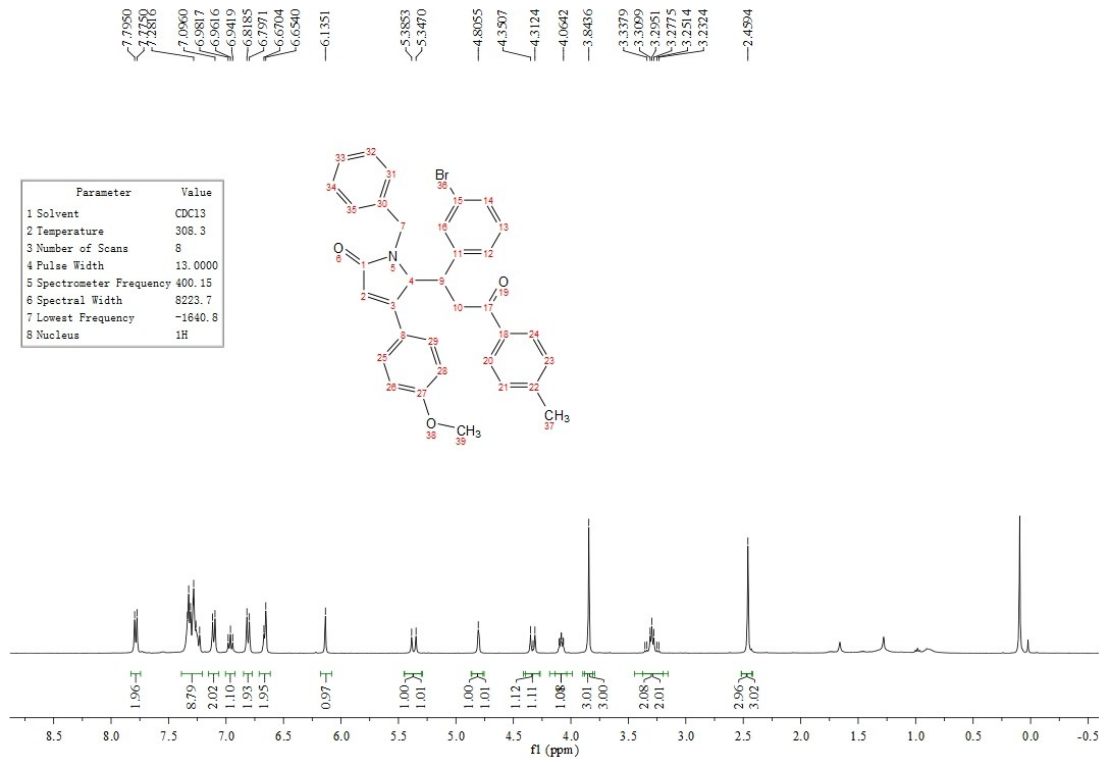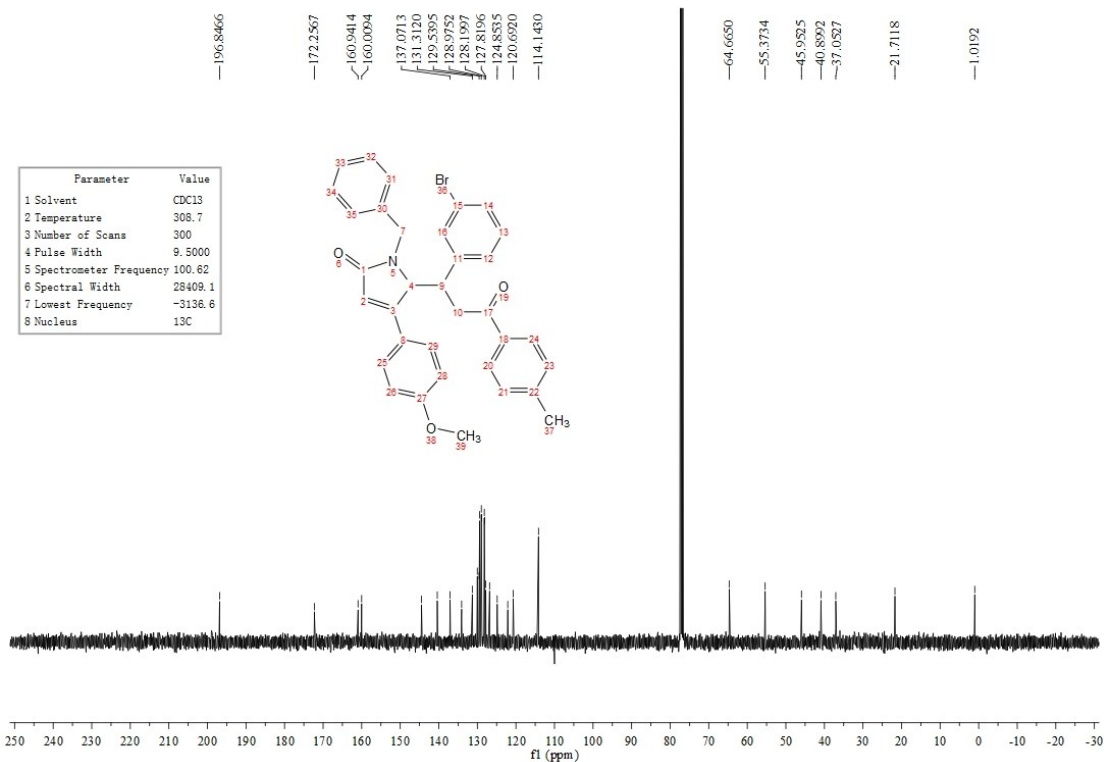

# <sup>1</sup>H NMR and <sup>13</sup>C NMR spectra of 3p

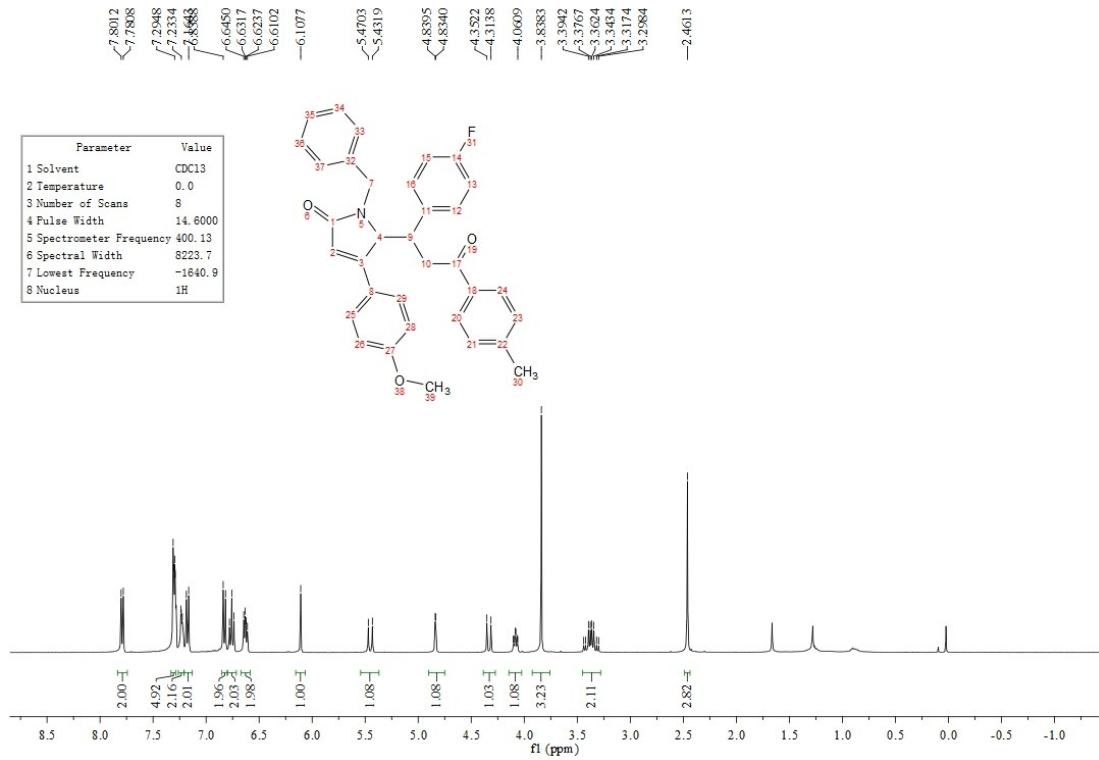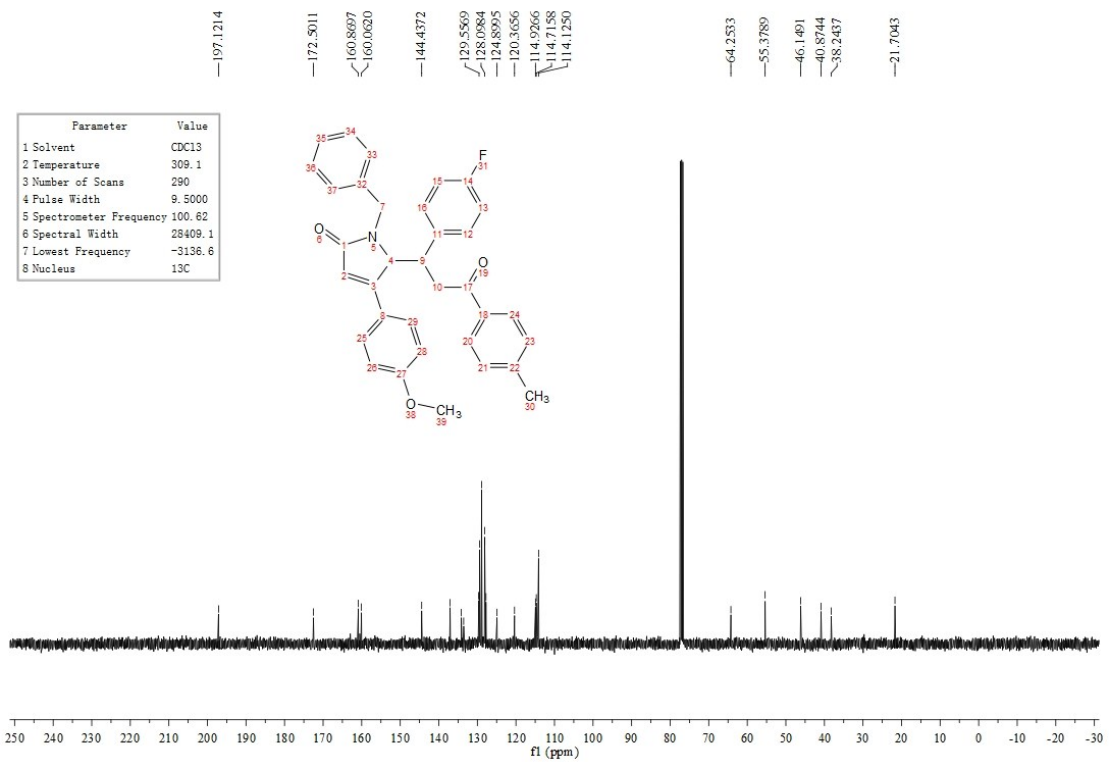

HSQC of 3p<sub>1</sub>

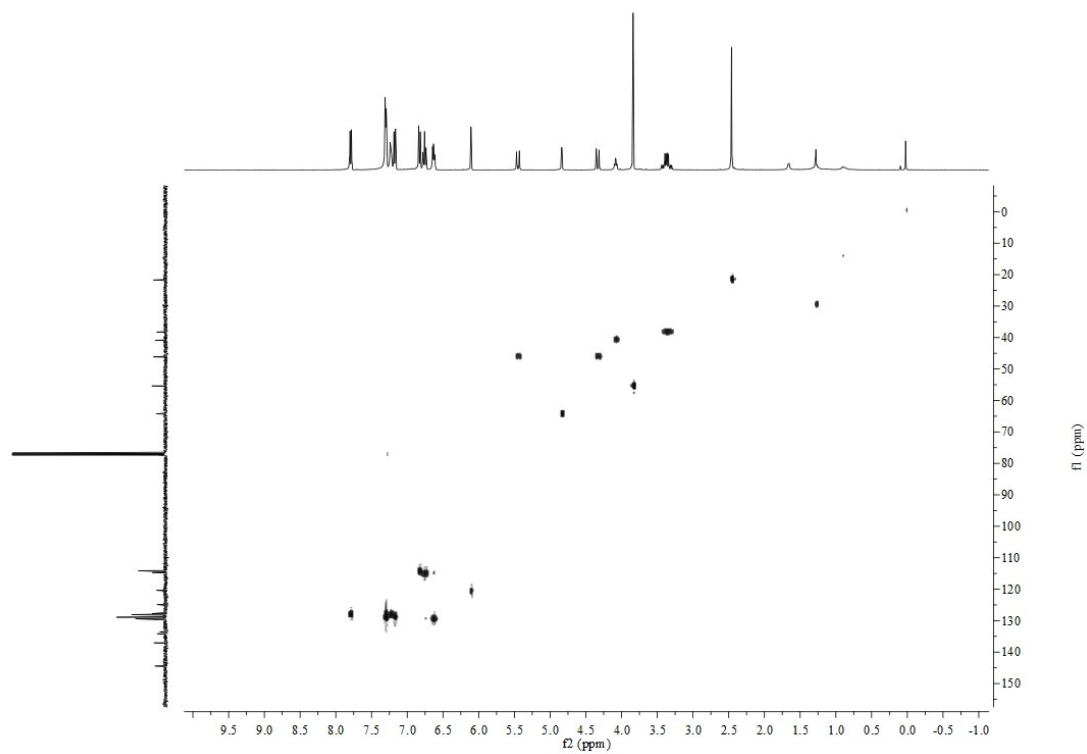

### HMBC of $3p_1$

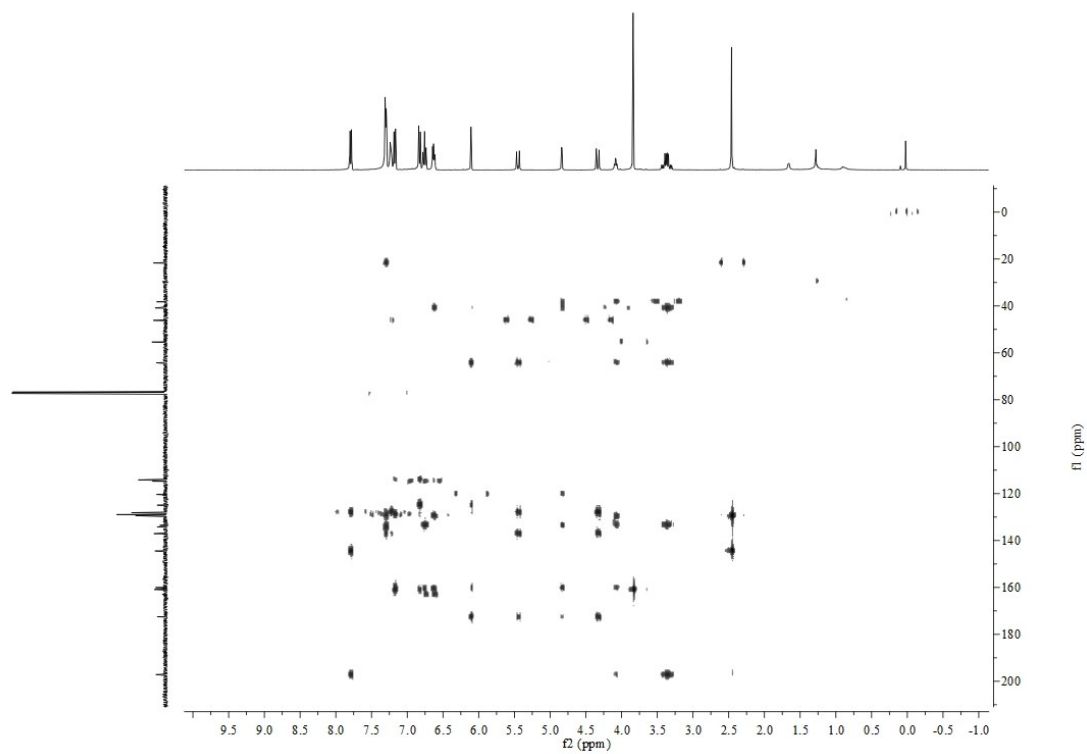

### NOE of 3p<sub>1</sub>

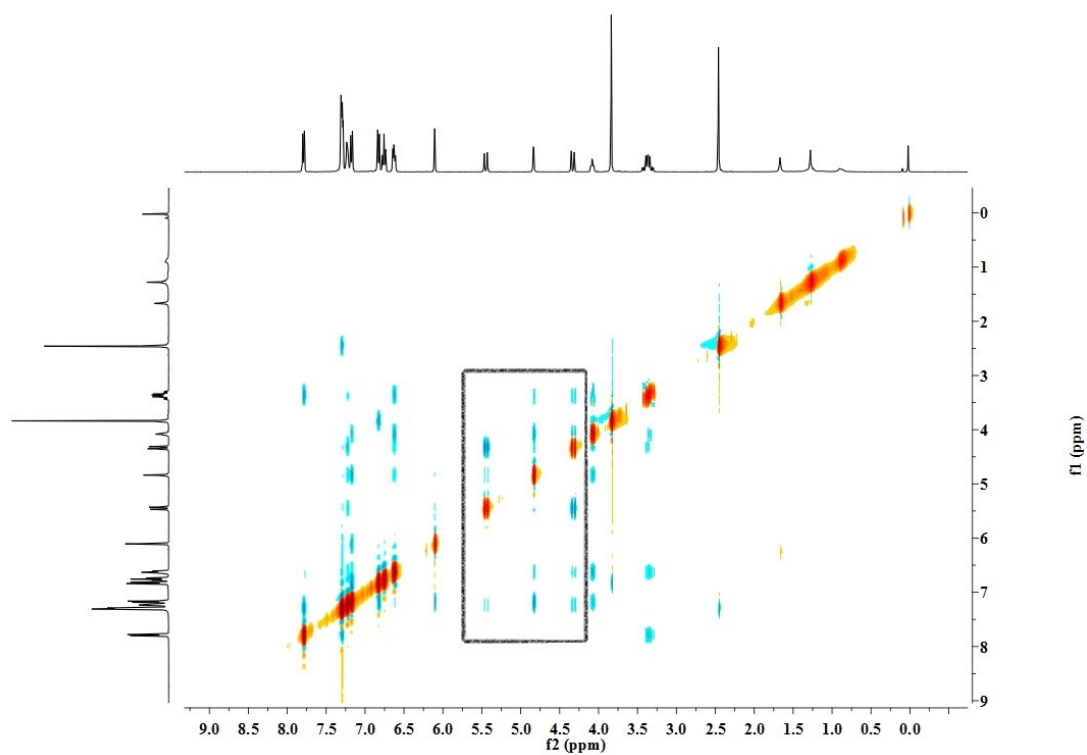

### NOE of 4-3p<sub>2</sub>

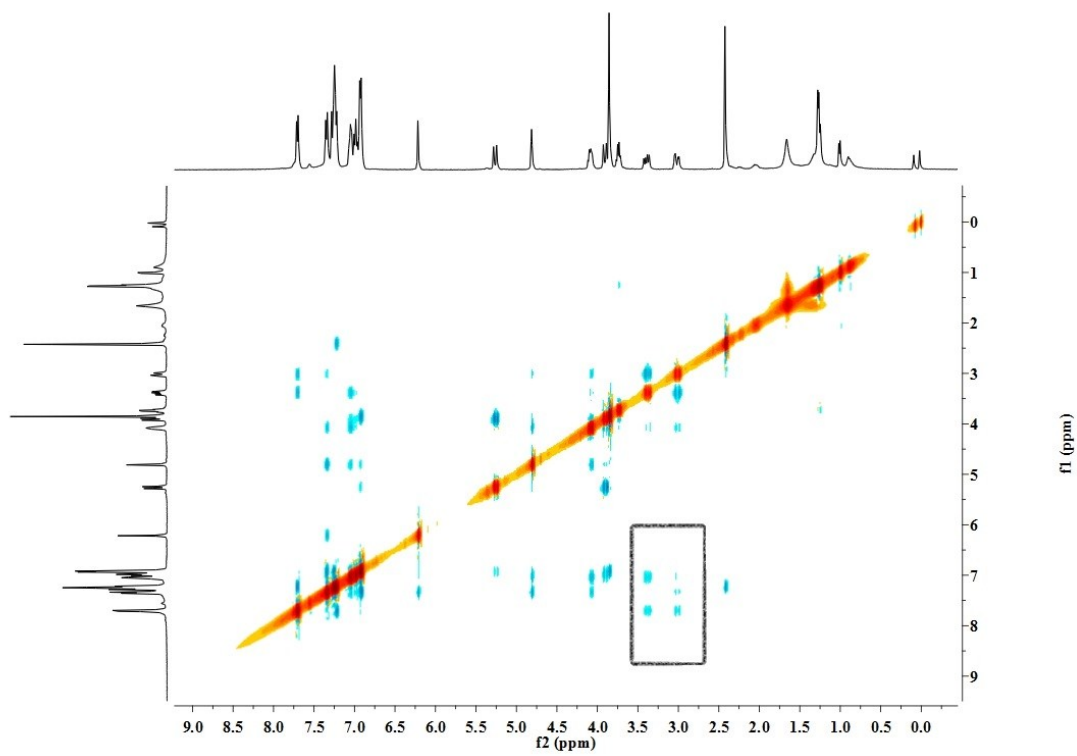



d HPLC Spectra  
3a (racemate)

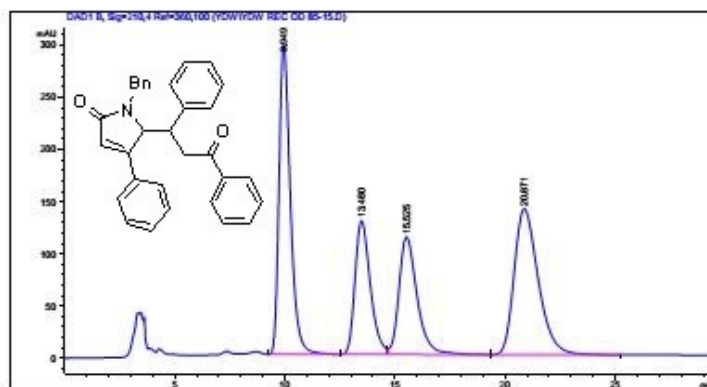

Area Percent Report

Sorted By : Signal  
Multiplier : 1.0000  
Dilution : 1.0000  
Sample Amount : 1.00000 [ng/ul] (not used in calc.)  
Use Multiplier & Dilution Factor with 15TDs

Signal 1: DAD1 8, Sig=210,4 Ref=360,100

| Peak # | RetTime [min] | Type | Width [min] | Area [mAU*s] | Height [mAU] | Area %  |
|--------|---------------|------|-------------|--------------|--------------|---------|
| 1      | 9.949         | BB   | 0.5468      | 1.06185e4    | 297.20639    | 31.3540 |
| 2      | 13.480        | BV   | 0.7381      | 6161.34131   | 127.89252    | 18.1931 |
| 3      | 15.525        | VB   | 0.8750      | 6455.24316   | 112.57828    | 19.0689 |
| 4      | 20.871        | BB   | 1.1551      | 1.06313e4    | 139.81512    | 31.3920 |

3a (chiral synthesis)

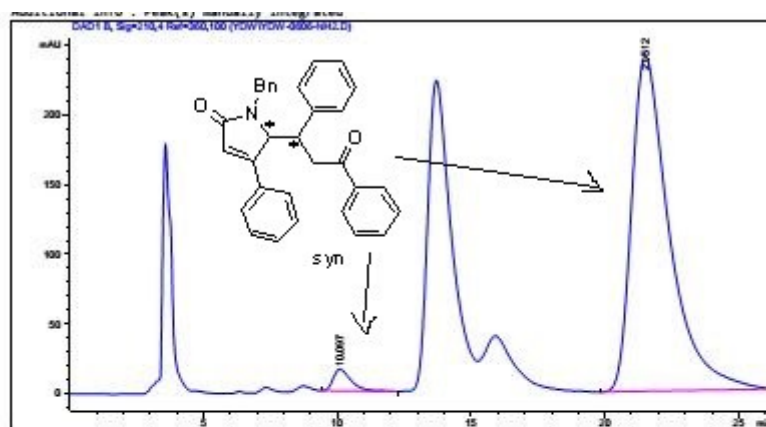

Area Percent Report

Sorted By : Signal  
Multiplier : 1.0000  
Dilution : 1.0000  
Sample Amount : 1.00000 [ng/ul] (not used in calc.)  
Use Multiplier & Dilution Factor with 15TDs

Signal 1: DAD1 8, Sig=210,4 Ref=360,100

| Peak # | RetTime [min] | Type | Width [min] | Area [mAU*s] | Height [mAU] | Area %  |
|--------|---------------|------|-------------|--------------|--------------|---------|
| 1      | 10.097        | BB   | 0.7018      | 730.05920    | 15.68619     | 2.9962  |
| 2      | 9.949         | BB   | 0.5468      | 1.06185e4    | 297.20639    | 31.3540 |
| 3      | 13.480        | BV   | 0.7381      | 6161.34131   | 127.89252    | 18.1931 |
| 4      | 20.871        | BB   | 1.1551      | 1.06313e4    | 139.81512    | 31.3920 |

### 3b (racemate)

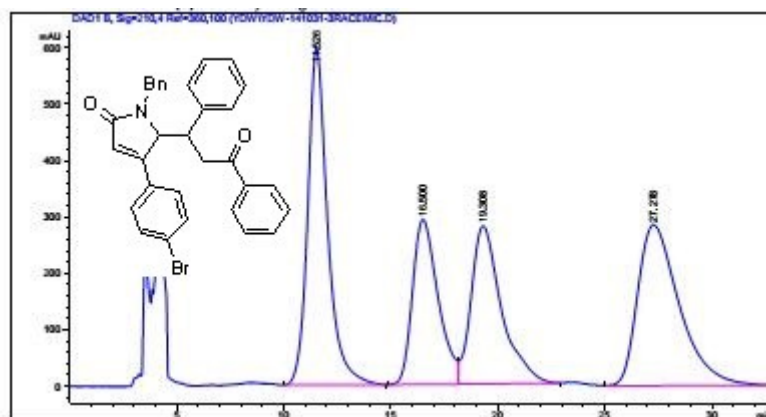

#### Area Percent Report

Sorted By : Signal  
Multiplier : 1.0000  
Dilution : 1.0000  
Sample Amount : 1.00000 [ng/ul] (not used in calc.)  
Use Multiplier & Dilution Factor with ISTDs

Signal 1: DAD1 B, Sig=210,4 Ref=360,100

| Peak # | RetTime [min] | Type | Width [min] | Area [mAU*s] | Height [mAU] | Area %  |
|--------|---------------|------|-------------|--------------|--------------|---------|
| 1      | 11.526        | BB   | 0.9501      | 3.84909e4    | 597.18274    | 29.8923 |
| 2      | 16.500        | BV   | 1.2671      | 2.43091e4    | 292.03491    | 18.8757 |
| 3      | 19.308        | VB   | 1.4643      | 2.75767e4    | 279.69925    | 21.4130 |
| 4      | 27.278        | BBA  | 2.0175      | 3.84824e4    | 284.72656    | 29.8190 |

### 3b (chiral synthesis)

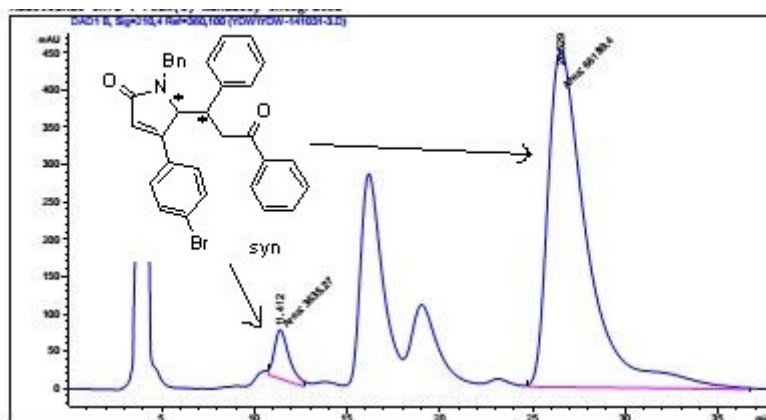

#### Area Percent Report

Sorted By : Signal  
Multiplier : 1.0000  
Dilution : 1.0000  
Sample Amount : 1.00000 [ng/ul] (not used in calc.)  
Use Multiplier & Dilution Factor with ISTDs

Signal 1: DAD1 B, Sig=210,4 Ref=360,100

| Peak # | RetTime [min] | Type | Width [min] | Area [mAU*s] | Height [mAU] | Area %  |
|--------|---------------|------|-------------|--------------|--------------|---------|
| 1      | 11.412        | MM   | 0.9221      | 3635.26733   | 65.70590     | 5.2063  |
| 2      | 26.529        | MM   | 2.4506      | 6.61894e4    | 450.15533    | 94.7937 |

### 3c (racemate)

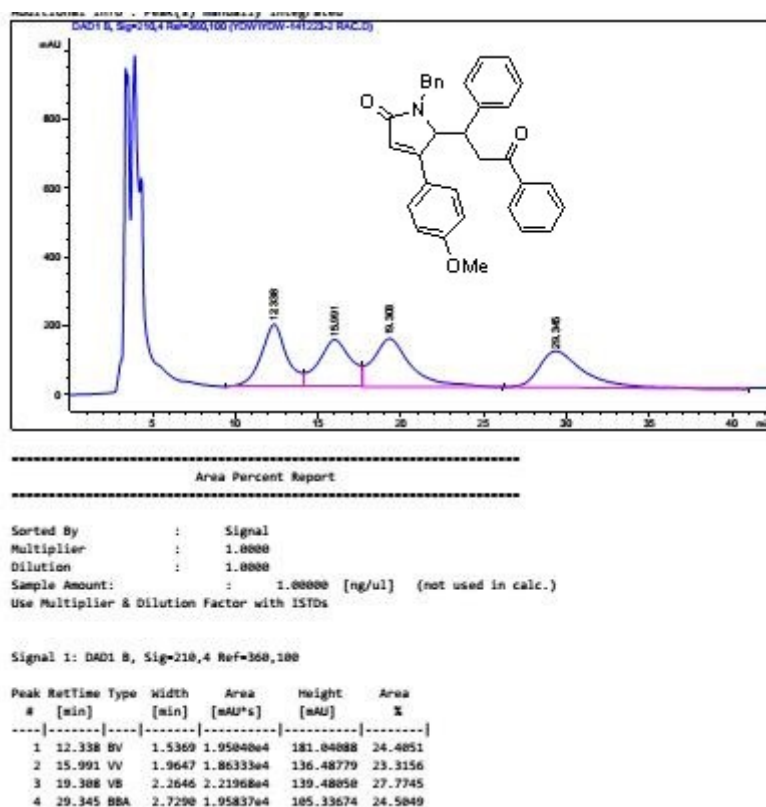

### 3c (chiral synthesis) (TLC)

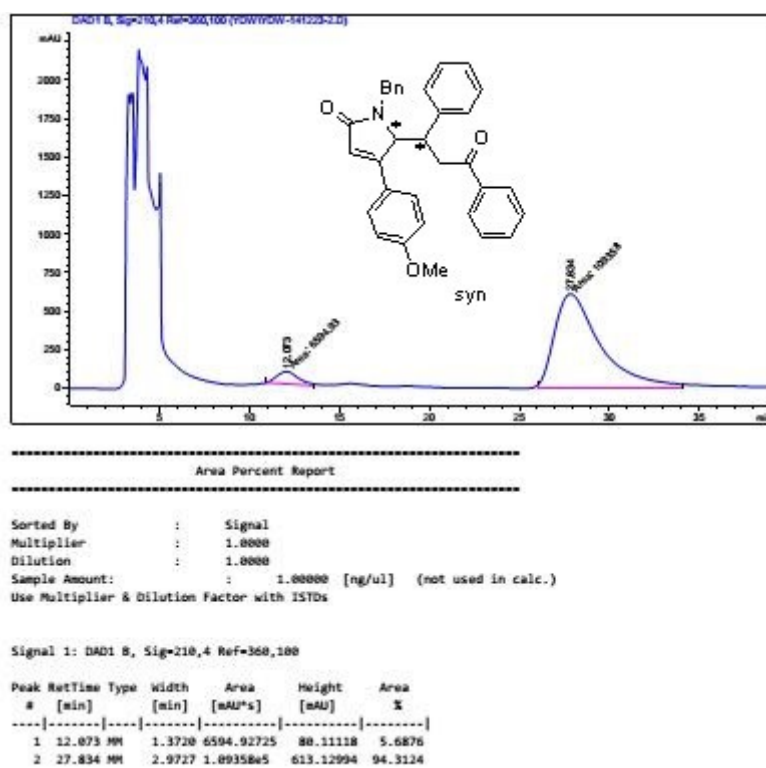

### 3d (racemate)

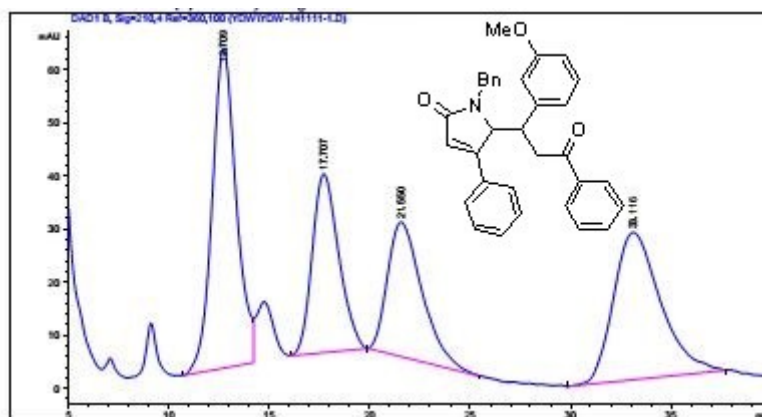

#### Area Percent Report

Sorted By : Signal  
Multiplier : 1.0000  
Dilution : 1.0000  
Sample Amount : 1.00000 [ng/ul] (not used in calc.)  
Use Multiplier & Dilution Factor with ISTDs

Signal 1: DAD1 8, Sig=210,4 Ref=360,100

| Peak # | RetTime [min] | Type | Width [min] | Area [mAU*s] | Height [mAU] | Area %  |
|--------|---------------|------|-------------|--------------|--------------|---------|
| 1      | 12.709        | BB   | 1.2297      | 5016.85791   | 60.23509     | 32.0046 |
| 2      | 17.707        | BB   | 1.2972      | 3086.44604   | 33.61441     | 19.6897 |
| 3      | 21.558        | BB   | 1.5107      | 3040.83301   | 25.25569     | 19.3987 |
| 4      | 33.116        | BB   | 1.9179      | 4531.30322   | 27.73825     | 28.9070 |

### 3d (chiral synthesis)

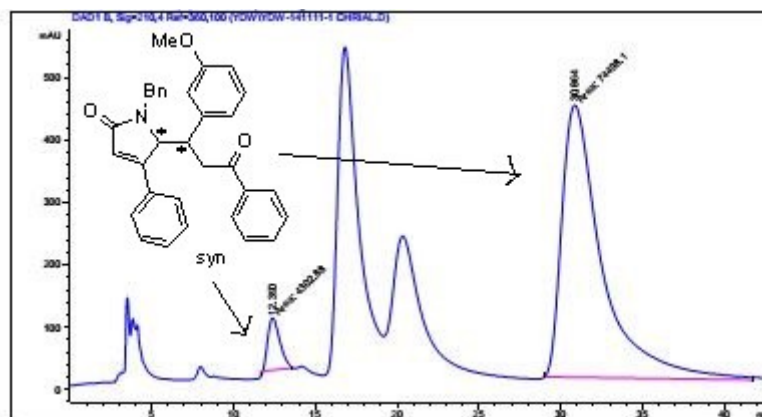

#### Area Percent Report

Sorted By : Signal  
Multiplier : 1.0000  
Dilution : 1.0000  
Sample Amount : 1.00000 [ng/ul] (not used in calc.)  
Use Multiplier & Dilution Factor with ISTDs

Signal 1: DAD1 8, Sig=210,4 Ref=360,100

| Peak # | RetTime [min] | Type | Width [min] | Area [mAU*s] | Height [mAU] | Area %  |
|--------|---------------|------|-------------|--------------|--------------|---------|
| 1      | 12.398        | MM   | 0.8572      | 4302.87549   | 83.06238     | 5.4604  |
| 2      | 30.864        | MM   | 2.8452      | 7.44981e4    | 436.40228    | 94.5396 |

### 3e (racemate) (TLC)

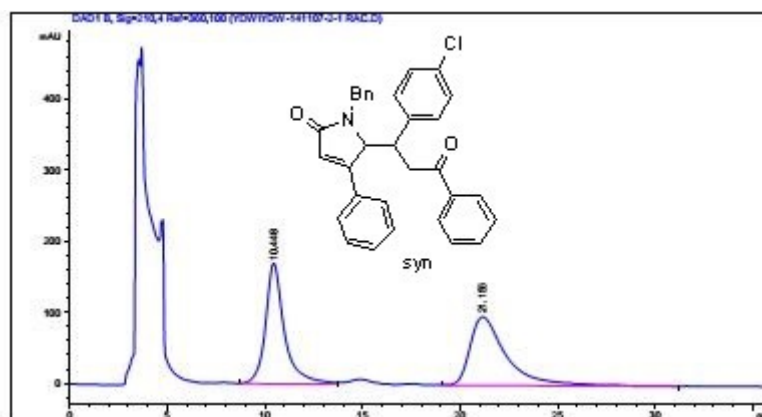

#### Area Percent Report

Sorted By : Signal  
Multiplier : 1.0000  
Dilution : 1.0000  
Sample Amount: : 1.00000 [ng/ul] (not used in calc.)  
Use Multiplier & Dilution Factor with ISTDs

Signal 1: DAD1 8, Sig=210,4 Ref=360,100

| Peak # | RetTime [min] | Type | Width [min] | Area [mAU*s] | Height [mAU] | Area %  |
|--------|---------------|------|-------------|--------------|--------------|---------|
| 1      | 10.448        | BV   | 0.9826      | 1.15052e4    | 169.77585    | 47.8761 |
| 2      | 21.186        | BB   | 1.9048      | 1.25260e4    | 96.34589     | 52.1239 |

### 3e (chiral synthesis) (TLC)

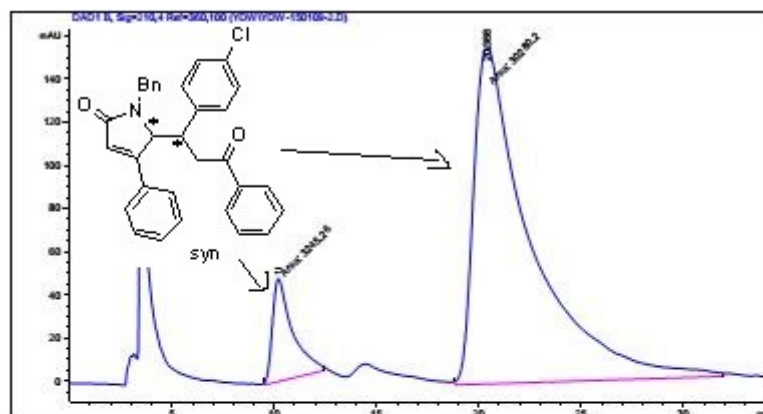

#### Area Percent Report

Sorted By : Signal  
Multiplier : 1.0000  
Dilution : 1.0000  
Sample Amount: : 1.00000 [ng/ul] (not used in calc.)  
Use Multiplier & Dilution Factor with ISTDs

Signal 1: DAD1 8, Sig=210,4 Ref=360,100

| Peak # | RetTime [min] | Type | Width [min] | Area [mAU*s] | Height [mAU] | Area %  |
|--------|---------------|------|-------------|--------------|--------------|---------|
| 1      | 10.196        | MM   | 1.1392      | 3245.25586   | 47.47949     | 9.6800  |
| 2      | 20.388        | MM   | 3.2326      | 3.02802e4    | 156.11835    | 90.3200 |

### 3f (racemate)

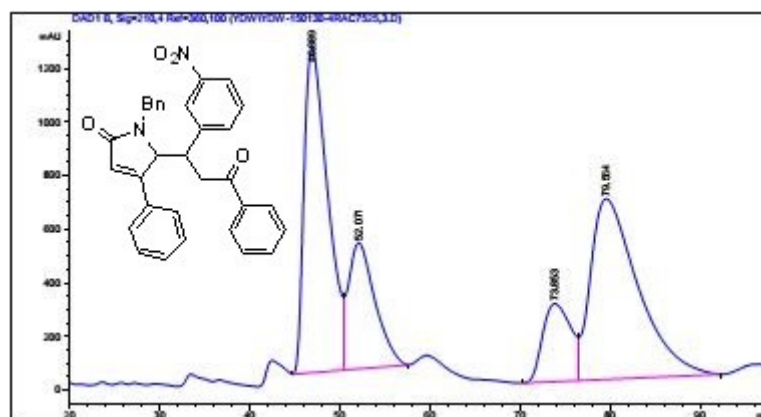

#### Area Percent Report

Sorted By : Signal  
Multiplier : 1.0000  
Dilution : 1.0000  
Sample Amount : 1.00000 [ng/ul] (not used in calc.)  
Use Multiplier & Dilution Factor with ISTDs

Signal 1: DAD1 8, Sig=210,4 Ref=360,100

| Peak # | RetTime [min] | Type | Width [min] | Area [mAU*s] | Height [mAU] | Area %  |
|--------|---------------|------|-------------|--------------|--------------|---------|
| 1      | 46.889        | VB   | 2.6564      | 2.19694e5    | 1211.08545   | 34.9578 |
| 2      | 52.071        | VB   | 2.9011      | 9.72297e4    | 470.86469    | 15.4713 |
| 3      | 75.853        | VB   | 3.3129      | 6.36835e4    | 291.12088    | 10.1206 |
| 4      | 79.564        | VB   | 5.1004      | 2.47927e5    | 673.85468    | 39.4503 |

### 3f (chiral synthesis)

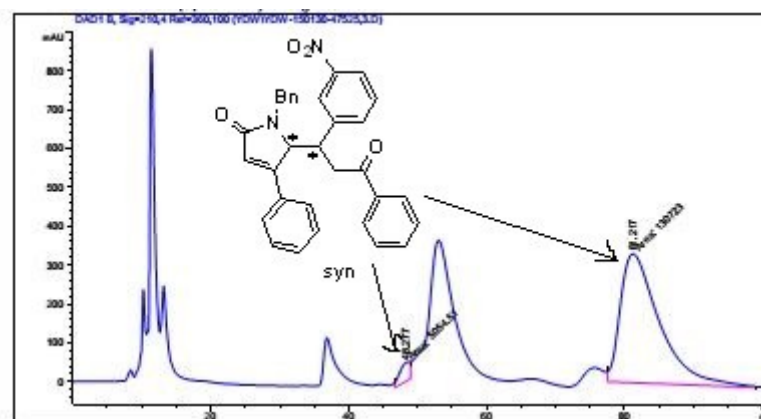

#### Area Percent Report

Sorted By : Signal  
Multiplier : 1.0000  
Dilution : 1.0000  
Sample Amount : 1.00000 [ng/ul] (not used in calc.)  
Use Multiplier & Dilution Factor with ISTDs

Signal 1: DAD1 8, Sig=210,4 Ref=360,100

| Peak # | RetTime [min] | Type | Width [min] | Area [mAU*s] | Height [mAU] | Area %  |
|--------|---------------|------|-------------|--------------|--------------|---------|
| 1      | 48.277        | MM   | 1.7692      | 5054.51825   | 47.61495     | 3.7226  |
| 2      | 81.217        | MM   | 6.5722      | 1.30723e5    | 331.50284    | 96.2774 |

### 3g (racemate)

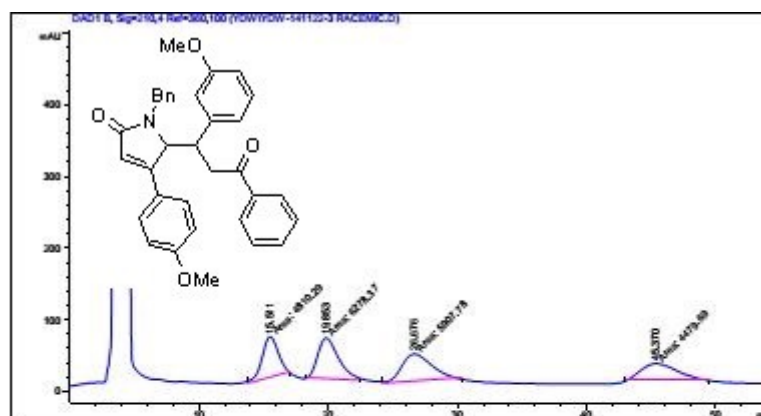

Area Percent Report

Sorted By : Signal  
Multiplier : 1.0000  
Dilution : 1.0000  
Sample Amount: : 1.00000 [ng/ul] (not used in calc.)  
Use Multiplier & Dilution Factor with ISTDs

Signal 1: DAD1 8, Sig=210,4 Ref=360,100

| Peak # | RetTime [min] | Type | Width [min] | Area [mAU*s] | Height [mAU] | Area %  |
|--------|---------------|------|-------------|--------------|--------------|---------|
| 1      | 15.511        | MM   | 1.4236      | 4810.29248   | 56.31573     | 22.3983 |
| 2      | 19.853        | MM   | 1.8553      | 6278.37207   | 56.48105     | 29.2342 |
| 3      | 26.676        | MM   | 2.6323      | 5907.78320   | 37.48553     | 27.5086 |
| 4      | 45.370        | MM   | 3.2365      | 4479.69336   | 23.06875     | 20.8589 |

### 3g (chiral synthesis)

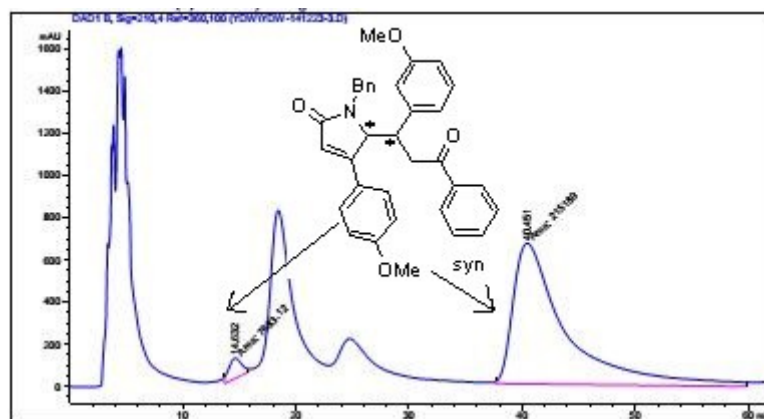

Area Percent Report

Sorted By : Signal  
Multiplier : 1.0000  
Dilution : 1.0000  
Sample Amount: : 1.00000 [ng/ul] (not used in calc.)  
Use Multiplier & Dilution Factor with ISTDs

Signal 1: DAD1 8, Sig=210,4 Ref=360,100

| Peak # | RetTime [min] | Type | Width [min] | Area [mAU*s] | Height [mAU] | Area %  |
|--------|---------------|------|-------------|--------------|--------------|---------|
| 1      | 14.632        | MM   | 1.3393      | 7683.11768   | 95.61041     | 3.4473  |
| 2      | 40.451        | MM   | 5.3806      | 2.15189e5    | 666.56329    | 96.5527 |

### 3h (racemate)

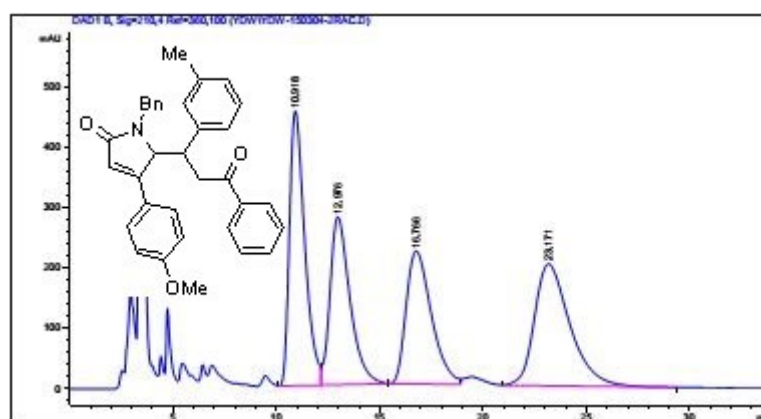

#### Area Percent Report

Sorted By : Signal  
Multiplier : 1.0000  
Dilution : 1.0000  
Sample Amount: : 1.00000 [ng/ul] (not used in calc.)  
Use Multiplier & Dilution Factor with ISTDs

Signal 1: DAD1 8, Sig=210,4 Ref=360,100

| Peak # | RetTime [min] | Type | Width [min] | Area [mAU*s] | Height [mAU] | Area %  |
|--------|---------------|------|-------------|--------------|--------------|---------|
| 1      | 10.918        | BV   | 0.7829      | 2.33706e4    | 455.28555    | 27.5040 |
| 2      | 12.976        | VB   | 1.0170      | 1.87172e4    | 278.17017    | 22.8275 |
| 3      | 16.766        | BV   | 1.3162      | 1.87503e4    | 220.47824    | 22.0666 |
| 4      | 23.171        | BB   | 1.8190      | 2.41335e4    | 201.82687    | 28.4819 |

### 3h (chiral synthesis) (TLC)

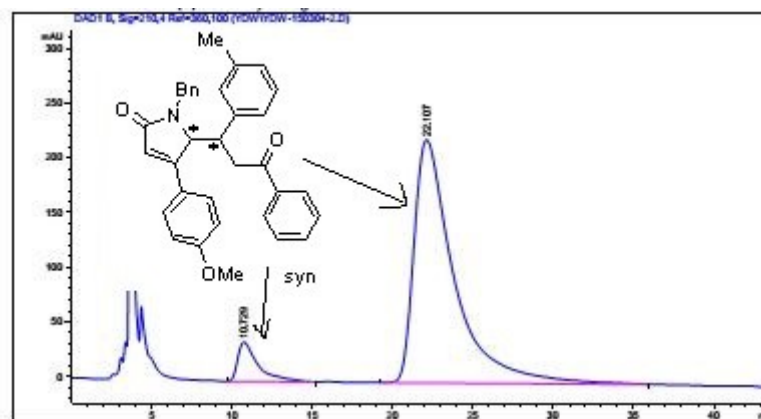

#### Area Percent Report

Sorted By : Signal  
Multiplier : 1.0000  
Dilution : 1.0000  
Sample Amount: : 1.00000 [ng/ul] (not used in calc.)  
Use Multiplier & Dilution Factor with ISTDs

Signal 1: DAD1 8, Sig=210,4 Ref=360,100

| Peak # | RetTime [min] | Type | Width [min] | Area [mAU*s] | Height [mAU] | Area %  |
|--------|---------------|------|-------------|--------------|--------------|---------|
| 1      | 10.729        | BB   | 1.2774      | 3184.38110   | 35.81236     | 7.5819  |
| 2      | 22.107        | BB   | 2.5188      | 3.88154e4    | 222.54672    | 92.4181 |



### 3i (racemate)

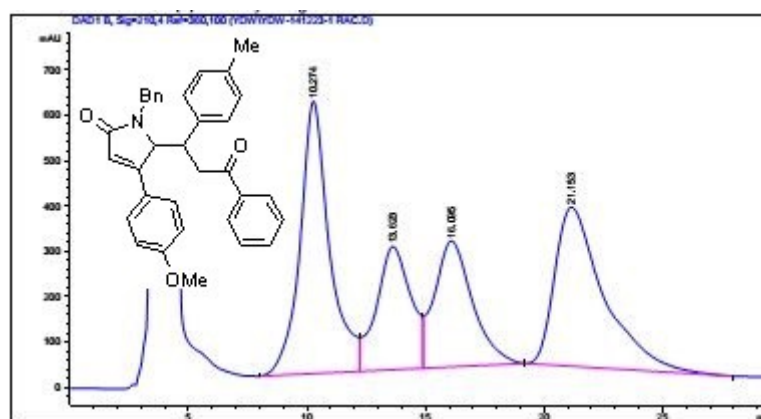

#### Area Percent Report

Sorted By : Signal  
Multiplier : 1.0000  
Dilution : 1.0000  
Sample Amount: : 1.00000 [ng/ul] (not used in calc.)  
Use Multiplier & Dilution Factor with ISTDs

Signal 1: DAD1 8, Sig=210,4 Ref=360,100

| Peak # | RetTime [min] | Type | Width [min] | Area [mAU*s] | Height [mAU] | Area %  |
|--------|---------------|------|-------------|--------------|--------------|---------|
| 1      | 10.274        | BV   | 1.2318      | 5.16034e4    | 599.76312    | 32.1674 |
| 2      | 13.623        | VV   | 1.4704      | 2.74204e4    | 271.46628    | 17.0927 |
| 3      | 16.095        | VB   | 1.6450      | 3.10892e4    | 277.92630    | 19.3797 |
| 4      | 21.153        | BBA  | 2.1169      | 5.03084e4    | 350.00052    | 31.3602 |

### 3i (chiral synthesis) (TLC)

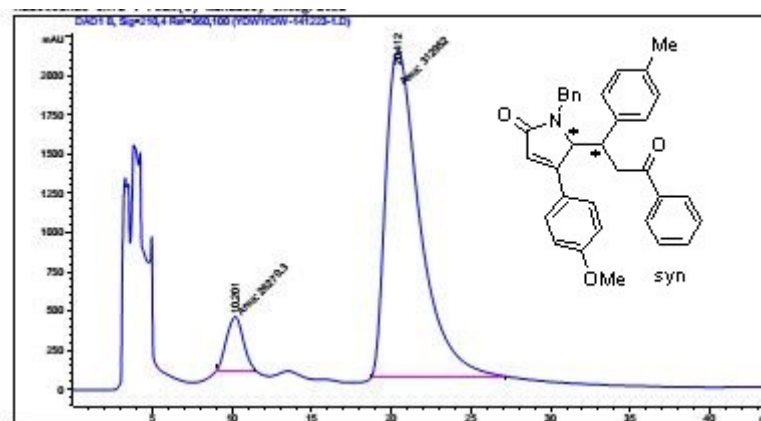

#### Area Percent Report

Sorted By : Signal  
Multiplier : 1.0000  
Dilution : 1.0000  
Sample Amount: : 1.00000 [ng/ul] (not used in calc.)  
Use Multiplier & Dilution Factor with ISTDs

Signal 1: DAD1 8, Sig=210,4 Ref=360,100

| Peak # | RetTime [min] | Type | Width [min] | Area [mAU*s] | Height [mAU] | Area %  |
|--------|---------------|------|-------------|--------------|--------------|---------|
| 1      | 10.201        | MM   | 1.2408      | 2.62703e4    | 352.86407    | 7.7443  |
| 2      | 20.412        | MM   | 2.5029      | 3.12952e5    | 2083.89014   | 92.2557 |

### 3j (racemate)

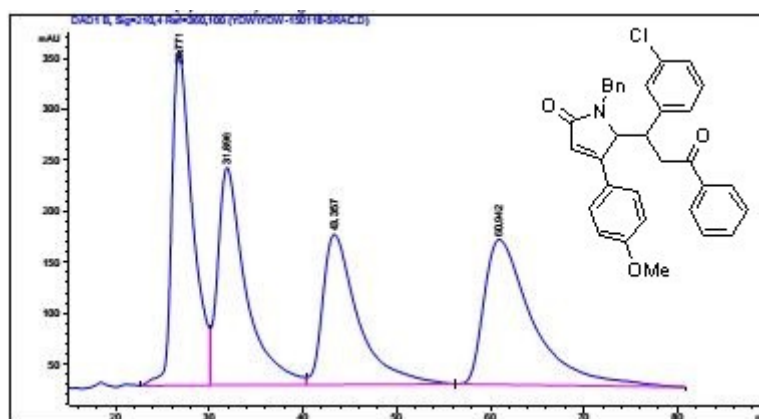

#### Area Percent Report

Sorted By : Signal  
Multiplier : 1.0000  
Dilution : 1.0000  
Sample Amount : 1.00000 [ng/ul] (not used in calc.)  
Use Multiplier & Dilution Factor with ISTDs

Signal 1: DAD1 8, Sig=210,4 Ref=360,100

| Peak # | RetTime [min] | Type | Width [min] | Area [mAU*s] | Height [mAU] | Area %  |
|--------|---------------|------|-------------|--------------|--------------|---------|
| 1      | 26.771        | BV   | 2.2724      | 5.04326e4    | 328.99589    | 27.2560 |
| 2      | 31.896        | VV   | 3.0178      | 4.47513e4    | 213.12899    | 24.1856 |
| 3      | 43.357        | VB   | 3.7344      | 3.85054e4    | 147.26816    | 20.8100 |
| 4      | 60.942        | BBA  | 4.8309      | 5.13437e4    | 142.25073    | 27.7484 |

### 3j (chiral synthesis)

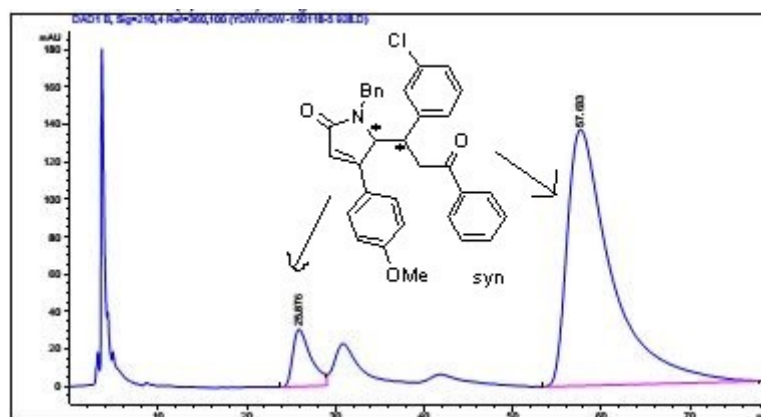

#### Area Percent Report

Sorted By : Signal  
Multiplier : 1.0000  
Dilution : 1.0000  
Sample Amount : 1.00000 [ng/ul] (not used in calc.)  
Use Multiplier & Dilution Factor with ISTDs

Signal 1: DAD1 8, Sig=210,4 Ref=360,100

| Peak # | RetTime [min] | Type | Width [min] | Area [mAU*s] | Height [mAU] | Area %  |
|--------|---------------|------|-------------|--------------|--------------|---------|
| 1      | 25.876        | BV   | 2.0809      | 4350.59033   | 30.48610     | 8.3778  |
| 2      | 57.633        | BB   | 4.8283      | 4.75793e4    | 136.84790    | 91.6222 |

### 3k (racemate)

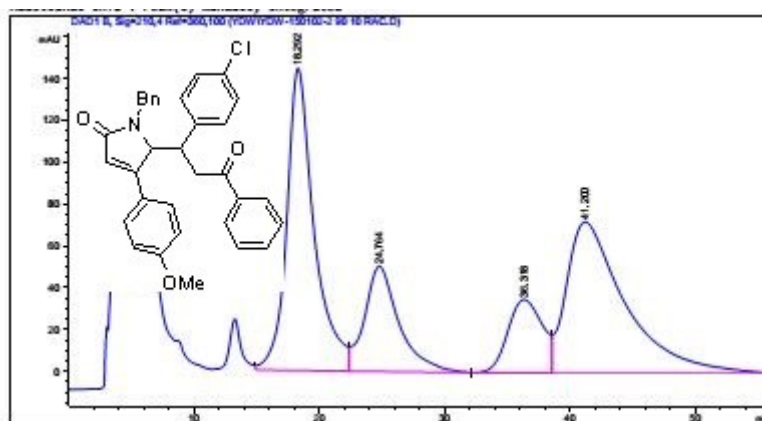

Area Percent Report

Sorted By : Signal  
Multiplier : 1.0000  
Dilution : 1.0000  
Sample Amount : 1.00000 [ng/ul] (not used in calc.)  
Use Multiplier & Dilution Factor with ISTDs

Signal 1: DAD1 B, Sig=210,4 Ref=360,100

| Peak # | RetTime [min] | Type | Width [min] | Area [mAU*s] | Height [mAU] | Area %  |
|--------|---------------|------|-------------|--------------|--------------|---------|
| 1      | 18.202        | VV   | 2.2181      | 2.19898e4    | 144.28152    | 35.5651 |
| 2      | 24.764        | VB   | 2.7537      | 9597.81172   | 58.30546     | 15.5217 |
| 3      | 36.318        | BV   | 2.9855      | 6677.47559   | 34.87929     | 18.7998 |
| 4      | 41.200        | VBA  | 4.6747      | 2.35654e4    | 72.22219     | 38.1134 |

### 3k (chiral synthesis) (TLC)

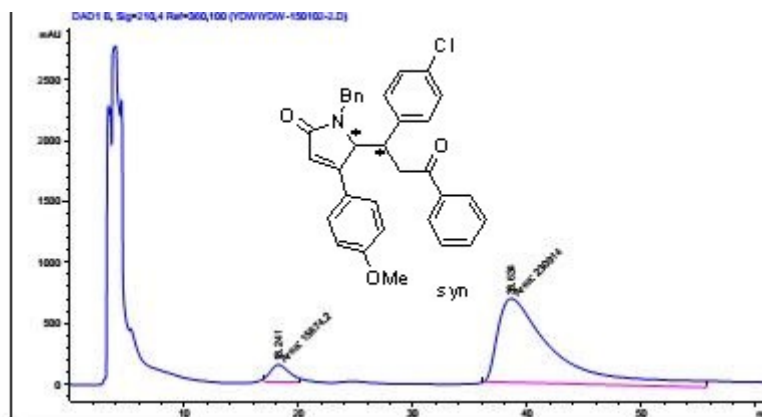

Area Percent Report

Sorted By : Signal  
Multiplier : 1.0000  
Dilution : 1.0000  
Sample Amount : 1.00000 [ng/ul] (not used in calc.)  
Use Multiplier & Dilution Factor with ISTDs

Signal 1: DAD1 B, Sig=210,4 Ref=360,100

| Peak # | RetTime [min] | Type | Width [min] | Area [mAU*s] | Height [mAU] | Area %  |
|--------|---------------|------|-------------|--------------|--------------|---------|
| 1      | 18.241        | MM   | 1.9073      | 1.56742e4    | 136.96678    | 6.3564  |
| 2      | 38.634        | MM   | 5.6135      | 2.30914e5    | 685.58960    | 93.6436 |

### 3l (racemate) (TLC)

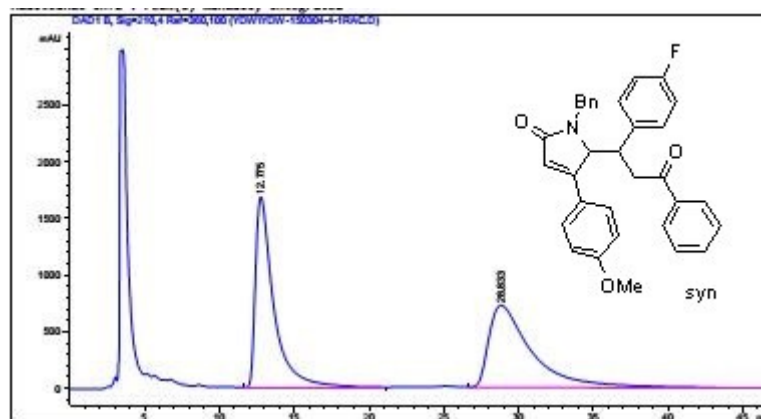

#### Area Percent Report

Sorted By : Signal  
Multiplier : 1.0000  
Dilution : 1.0000  
Sample Amount: : 1.00000 [ng/ul] (not used in calc.)  
Use Multiplier & Dilution Factor with ISTDs

Signal 1: DAD1 8, Sig=218,4 Ref=368,100

| Peak # | RetTime [min] | Type | Width [min] | Area [mAU*s] | Height [mAU] | Area %  |
|--------|---------------|------|-------------|--------------|--------------|---------|
| 1      | 12.775        | BB   | 1.2417      | 1.43227e5    | 1681.60352   | 49.4632 |
| 2      | 28.833        | VBA  | 2.9138      | 1.46336e5    | 725.31812    | 50.5368 |

### 3l (chiral synthesis) (TLC)

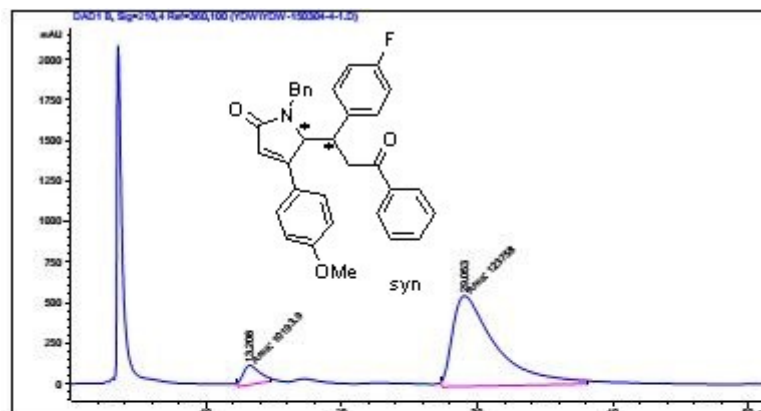

#### Area Percent Report

Sorted By : Signal  
Multiplier : 1.0000  
Dilution : 1.0000  
Sample Amount: : 1.00000 [ng/ul] (not used in calc.)  
Use Multiplier & Dilution Factor with ISTDs

Signal 1: DAD1 8, Sig=218,4 Ref=368,100

| Peak # | RetTime [min] | Type | Width [min] | Area [mAU*s] | Height [mAU] | Area %  |
|--------|---------------|------|-------------|--------------|--------------|---------|
| 1      | 13.208        | MM   | 1.4396      | 1.01939e4    | 118.01665    | 7.6181  |
| 2      | 29.053        | MM   | 3.7035      | 1.23758e5    | 556.93983    | 92.3899 |

### 3m (racemate)

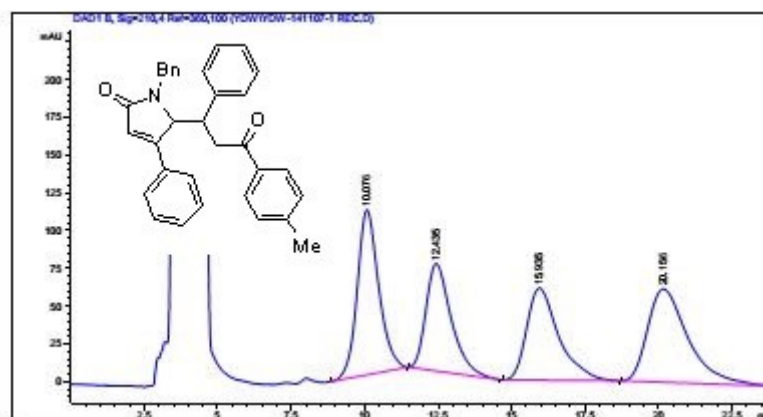

#### Area Percent Report

Sorted By : Signal  
Multiplier : 1.0000  
Dilution : 1.0000  
Sample Amount: : 1.00000 [ng/ul] (not used in calc.)  
Use Multiplier & Dilution Factor with ISTDs

Signal 1: DAD1 8, Sig=210,4 Ref=360,100

| Peak # | RetTime [min] | Type | Width [min] | Area [mAU*s] | Height [mAU] | Area %  |
|--------|---------------|------|-------------|--------------|--------------|---------|
| 1      | 10.076        | BB   | 0.6070      | 5559.17383   | 109.68704    | 27.3819 |
| 2      | 12.435        | BB   | 0.6996      | 4244.03760   | 70.97652     | 20.9042 |
| 3      | 15.935        | BB   | 0.8908      | 4616.91357   | 60.74260     | 22.7408 |
| 4      | 20.156        | BBA  | 1.1121      | 5882.22412   | 61.79204     | 28.9731 |

### 3m (chiral synthesis)

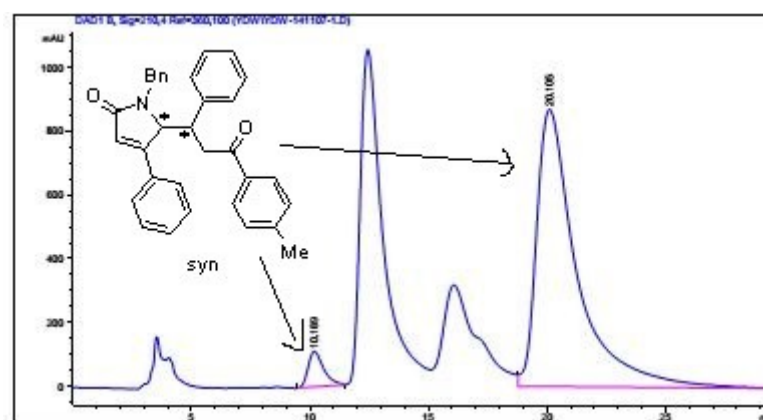

#### Area Percent Report

Sorted By : Signal  
Multiplier : 1.0000  
Dilution : 1.0000  
Sample Amount: : 1.00000 [ng/ul] (not used in calc.)  
Use Multiplier & Dilution Factor with ISTDs

Signal 1: DAD1 8, Sig=210,4 Ref=360,100

| Peak # | RetTime [min] | Type | Width [min] | Area [mAU*s] | Height [mAU] | Area %  |
|--------|---------------|------|-------------|--------------|--------------|---------|
| 1      | 10.189        | BB   | 0.6838      | 5028.90186   | 111.16707    | 4.6734  |
| 2      | 20.105        | VBA  | 1.7304      | 1.02578e5    | 868.20450    | 95.3266 |

### 3n (racemate)

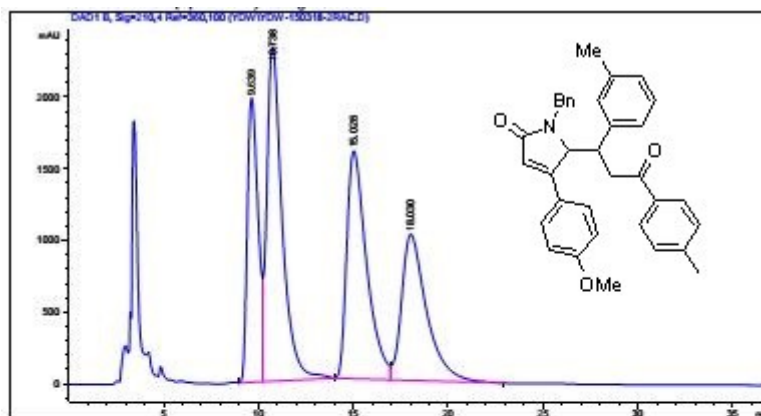

#### Area Percent Report

Sorted By : Signal  
Multiplier : 1.0000  
Dilution : 1.0000  
Sample Amount: : 1.00000 [ng/ul] (not used in calc.)  
Use Multiplier & Dilution Factor with ISTDs

Signal 1: DAD1 B, Sig=210,4 Ref=360,100

| Peak # | RetTime [min] | Type | Width [min] | Area [mAU*s] | Height [mAU] | Area %  |
|--------|---------------|------|-------------|--------------|--------------|---------|
| 1      | 9.639         | BV   | 0.6025      | 7.78054e4    | 1979.83740   | 18.6821 |
| 2      | 10.738        | BV   | 0.8407      | 1.31915e5    | 2329.24609   | 31.5398 |
| 3      | 15.028        | BV   | 1.0923      | 1.15353e5    | 1586.44910   | 27.5792 |
| 4      | 18.050        | BV   | 1.3516      | 9.31871e4    | 1018.35791   | 22.2797 |

### 3n (chiral synthesis) (TLC)

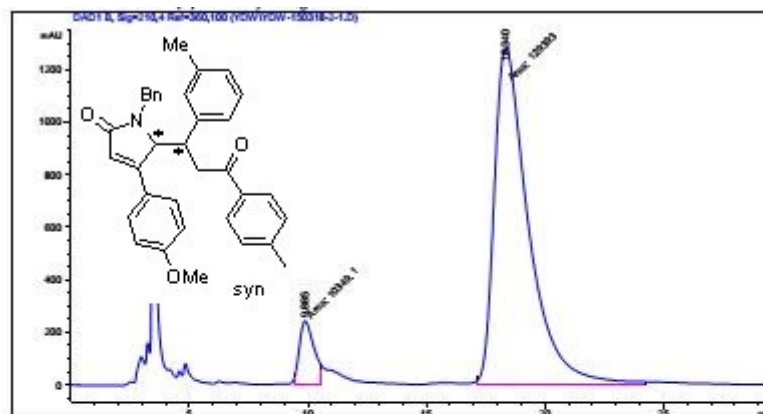

#### Area Percent Report

Sorted By : Signal  
Multiplier : 1.0000  
Dilution : 1.0000  
Sample Amount: : 1.00000 [ng/ul] (not used in calc.)  
Use Multiplier & Dilution Factor with ISTDs

Signal 1: DAD1 B, Sig=210,4 Ref=360,100

| Peak # | RetTime [min] | Type | Width [min] | Area [mAU*s] | Height [mAU] | Area %  |
|--------|---------------|------|-------------|--------------|--------------|---------|
| 1      | 9.885         | MH   | 0.7097      | 1.03491e4    | 243.03770    | 7.4058  |
| 2      | 18.340        | MH   | 1.6763      | 1.29393e5    | 1286.47400   | 92.5942 |

### 4-3o (racemate) (TLC)

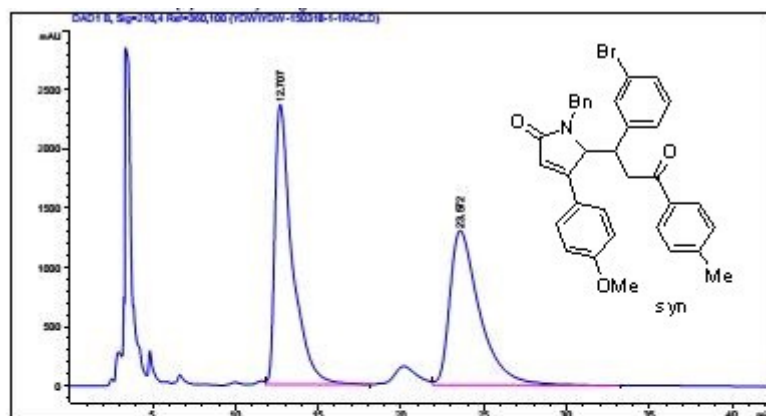

#### Area Percent Report

Sorted By : Signal  
Multiplier : 1.0000  
Dilution : 1.0000  
Sample Amount : 1.00000 [ng/ul] (not used in calc.)  
Use Multiplier & Dilution Factor with ISTDs

Signal 1: DAD1 B, Sig=210,4 Ref=360,100

| Peak # | RetTime [min] | Type | Width [min] | Area [mAU*s] | Height [mAU] | Area %  |
|--------|---------------|------|-------------|--------------|--------------|---------|
| 1      | 12.707        | VB   | 1.0600      | 1.72929e5    | 2365.11572   | 51.4293 |
| 2      | 23.572        | VV   | 1.8607      | 1.63317e5    | 1304.45227   | 48.5707 |

### 4-3o (chiral synthesis) (TLC)

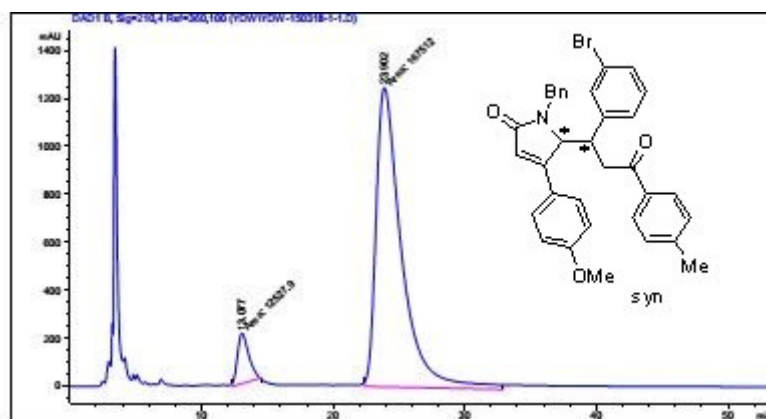

#### Area Percent Report

Sorted By : Signal  
Multiplier : 1.0000  
Dilution : 1.0000  
Sample Amount : 1.00000 [ng/ul] (not used in calc.)  
Use Multiplier & Dilution Factor with ISTDs

Signal 1: DAD1 B, Sig=210,4 Ref=360,100

| Peak # | RetTime [min] | Type | Width [min] | Area [mAU*s] | Height [mAU] | Area %  |
|--------|---------------|------|-------------|--------------|--------------|---------|
| 1      | 13.077        | MM   | 0.9031      | 1.25279e4    | 210.25302    | 6.9584  |
| 2      | 23.902        | MM   | 2.2377      | 1.67512e5    | 1247.65112   | 93.0416 |

### 3p (racemate)

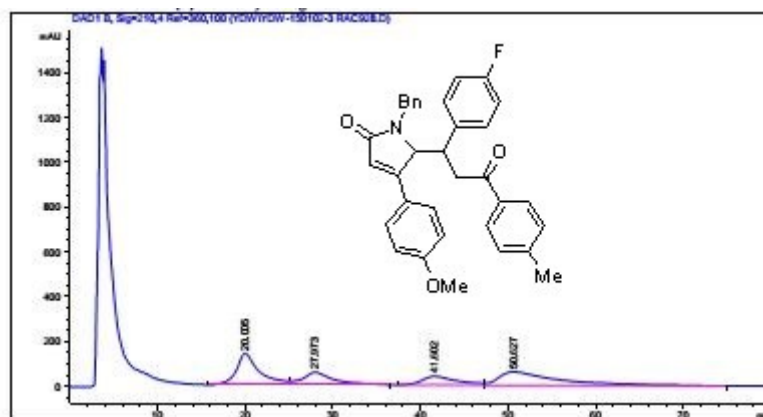

#### Area Percent Report

Sorted By : Signal  
Multiplier : 1.0000  
Dilution : 1.0000  
Sample Amount: : 1.00000 [ng/ul] (not used in calc.)  
Use Multiplier & Dilution Factor with ISTDs

Signal 1: DAD1 B, Sig=210,4 Ref=360,100

| Peak # | RetTime [min] | Type | Width [min] | Area [mAU*s] | Height [mAU] | Area %  |
|--------|---------------|------|-------------|--------------|--------------|---------|
| 1      | 20.005        | BV   | 2.5089      | 2.54519e4    | 140.27394    | 33.5232 |
| 2      | 27.973        | VB   | 3.3375      | 1.32702e4    | 54.94041     | 17.4785 |
| 3      | 41.602        | BV   | 3.7916      | 1.00480e4    | 37.48143     | 13.2344 |
| 4      | 50.627        | VV   | 6.0889      | 2.71532e4    | 58.65455     | 35.7640 |

### 3p (chiral synthesis) (TLC)

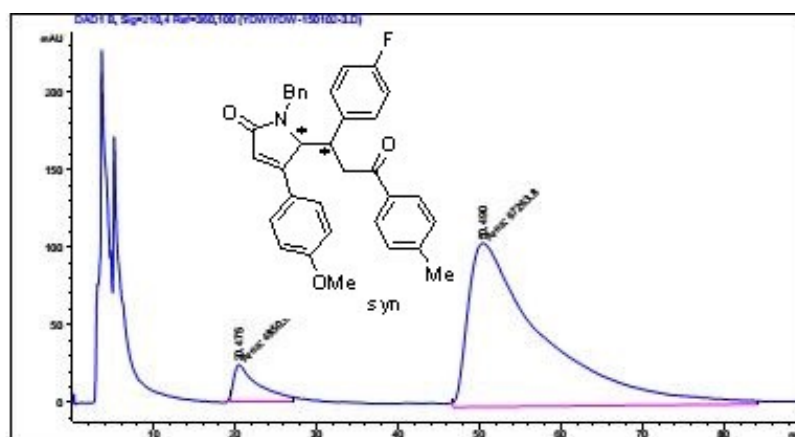

#### Area Percent Report

Sorted By : Signal  
Multiplier : 1.0000  
Dilution : 1.0000  
Sample Amount: : 1.00000 [ng/ul] (not used in calc.)  
Use Multiplier & Dilution Factor with ISTDs

Signal 1: DAD1 B, Sig=210,4 Ref=360,100

| Peak # | RetTime [min] | Type | Width [min] | Area [mAU*s] | Height [mAU] | Area %  |
|--------|---------------|------|-------------|--------------|--------------|---------|
| 1      | 20.475        | MM   | 3.4647      | 4850.07801   | 23.33111     | 6.7256  |
| 2      | 50.490        | MM   | 10.6406     | 6.72637e4    | 105.35722    | 93.2744 |
